# Supplementary material for: SHP2 inhibitors maintain TGFβ signalling through SMURF2 inhibition
Source: PubMed Central journal article supplement (PMC10724235; doi:10.1038/s41698-023-00486-6), 2023-12-15
Supplement: 41698_2023_486_MOESM1_ESM.pdf [file 41698_2023_486_MOESM1_ESM.pdf]

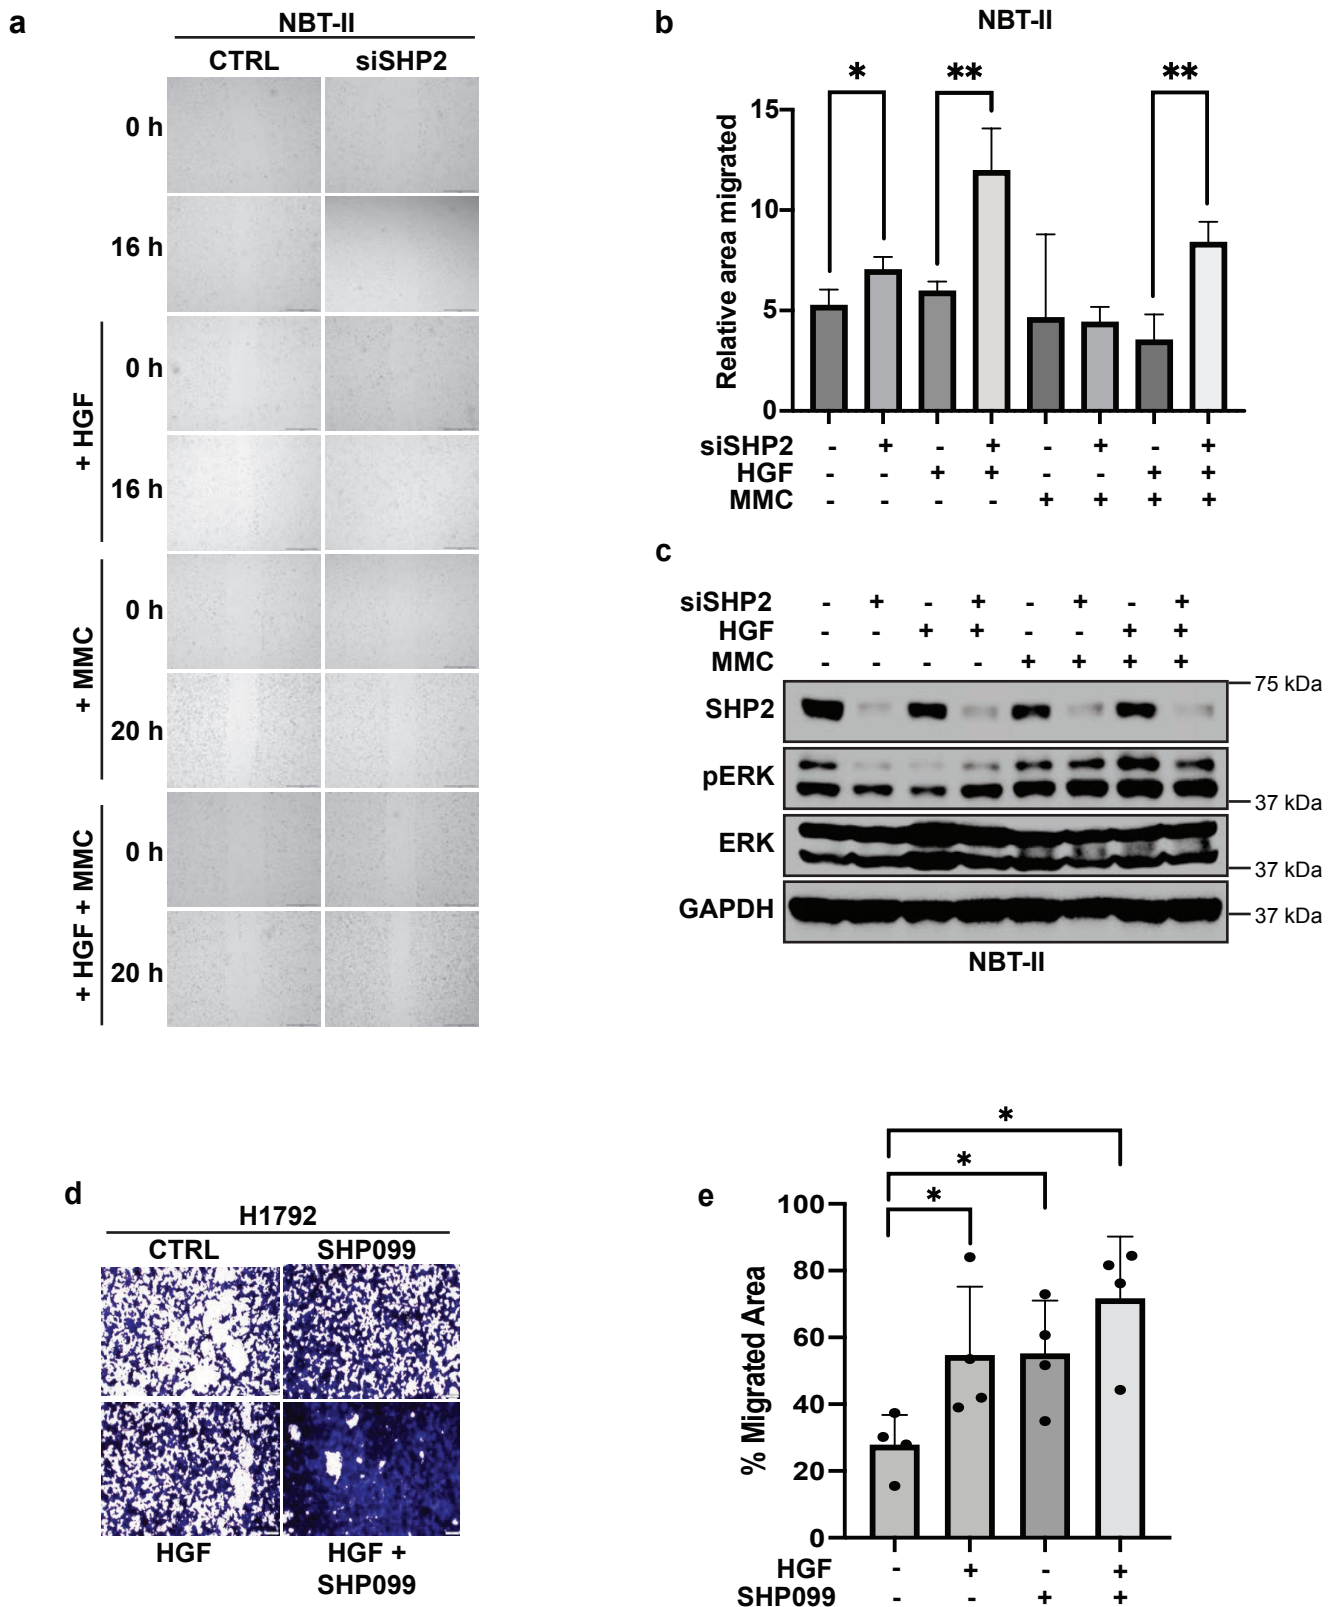

**Supplementary Figure 1. SHP2 inhibition enhances invasion in bladder and lung cancer cell lines.**

(a) NBT-II cells transfected with siRNA targeting SHP2 or relevant controls were plated for scratch assay and treated with either DMSO, HGF (8  $\mu$ M), mitomycin C (5 $\mu$ g/ml) or HGF (8  $\mu$ M) in combination with mitomycin C (5 $\mu$ g/ml), panels show migration at 0, 16, or 20 hours. Representative images are shown (scale bars, 650  $\mu$ m). (b). Percentage of migrated area was determined with respect to control (0 h) and a graph was plotted. \*P < 0.05, \*\*P < 0.01 using Student's t-test. Data are mean SD from three random fields. Data are representative of three independent experiments with similar results. (c) Immunoblot of NBT-II cells from A and B. Lysates are probed with indicated antibodies. (d) Transwell assay of H1792 cells treated with SHP099 (10  $\mu$ M), HGF (8  $\mu$ M), or in combination for 16 hours prior to fixation and crystal violet staining (scale bars 100  $\mu$ m). (e) Graph represents percent number of migrated cells taken from four different random fields from panel (d). Data are mean  $\pm$  SD of triplicate samples from a representative experiment performed three times. \*P < 0.05 using Student's t-test.

**a**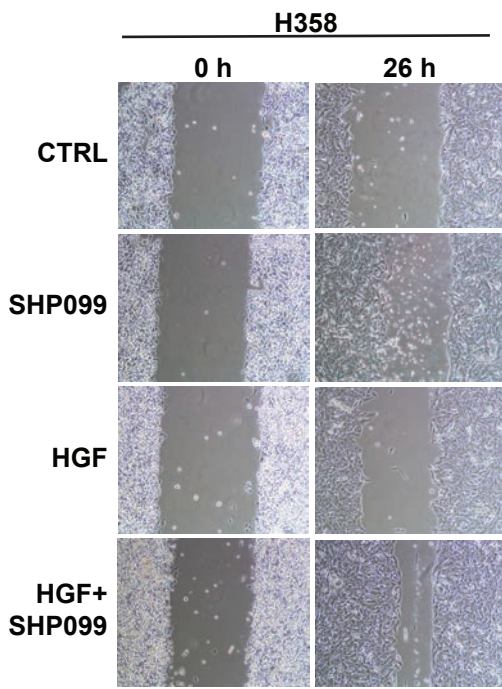**b**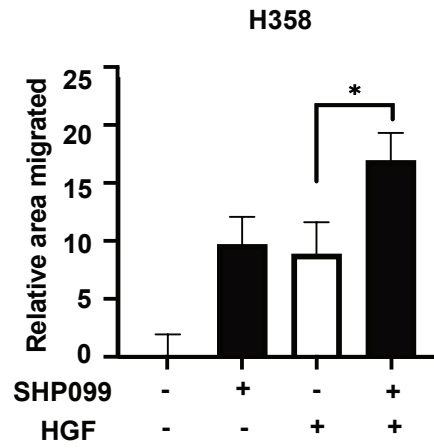**c**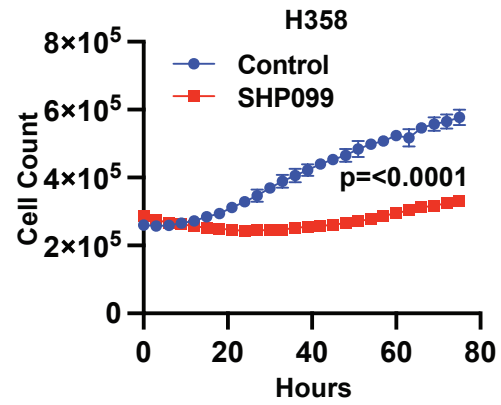**d**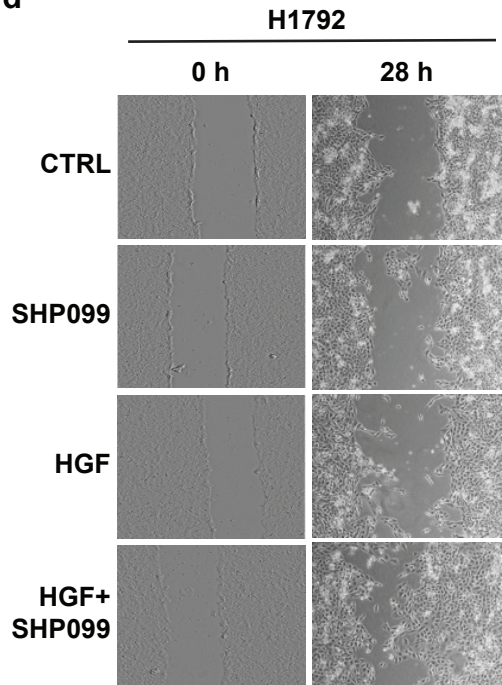**e**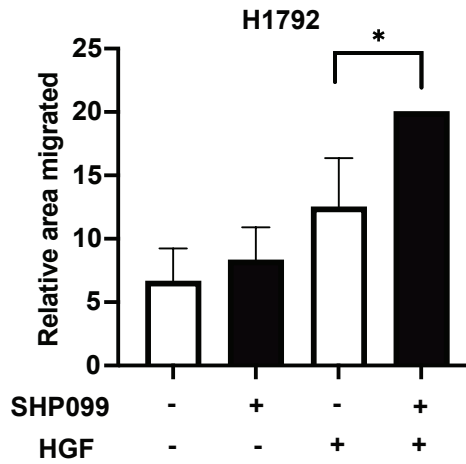**f**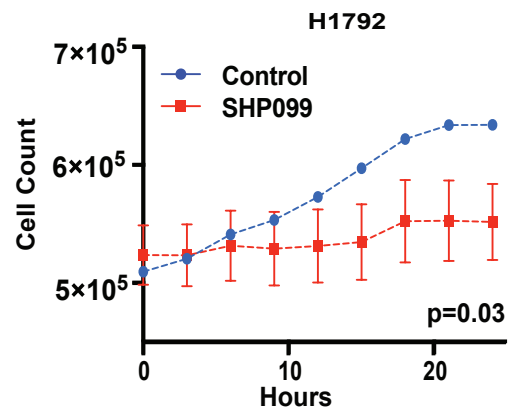

**Supplementary Figure 2. SHP2 inhibition enhances invasion in KRAS mutant lung cancer cell lines.**

(a) H358 cells treated with SHP099 (10  $\mu$ M) or DMSO were plated for scratch assay and treated with or without HGF (8  $\mu$ M), panels show migration at 0 and 26 h. Representative images are shown (scale bars, 200  $\mu$ m). (b) Percentage of migrated area was determined with respect to control (0 h) and a graph was plotted. \* $P \leq 0.05$  using Student's t-test. Data are mean  $\pm$  SD from three random fields. Data are representative of three independent experiments with similar results. (c) Overall cell count of H358 cells from A and B treated with or without SHP099 (10  $\mu$ M) for indicated time points and relevant data was plotted.  $P \leq 0.0001$  using Student's t-test. Data are mean  $\pm$  SD from nine random fields. Data are representative of two independent experiments with similar results. (d) H1792 cells treated with SHP099 (10  $\mu$ M) or DMSO were plated for scratch assay and treated with or without HGF (8  $\mu$ M), panels show migration at 0 and 28 h. Representative images are shown (scale bars, 200  $\mu$ m). (e) Percentage of migrated area was determined with respect to control (0 h) and a graph was plotted. \* $P \leq 0.05$  using Student's t-test. Data are mean  $\pm$  SD from three random fields. Data are representative of three independent experiments with similar results. (f) Overall cell count of H1792 cells from D and E treated with or without SHP099 (10  $\mu$ M) for indicated time points and relevant data was plotted.  $P=0.03$  using Student's t-test. Data are mean  $\pm$  SD from nine random fields. Data are representative of two independent experiments with similar results.

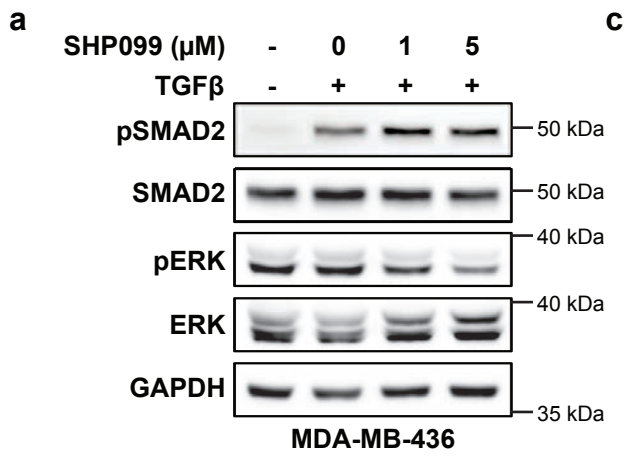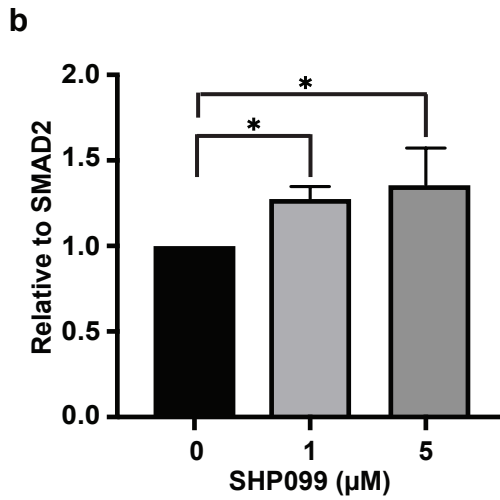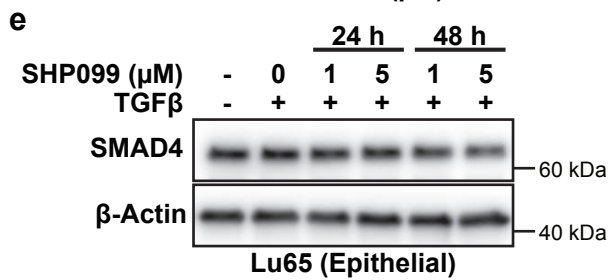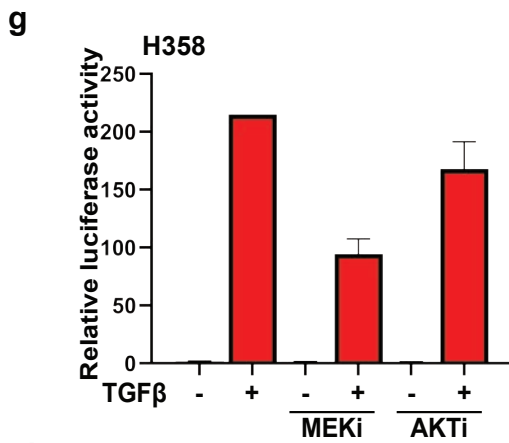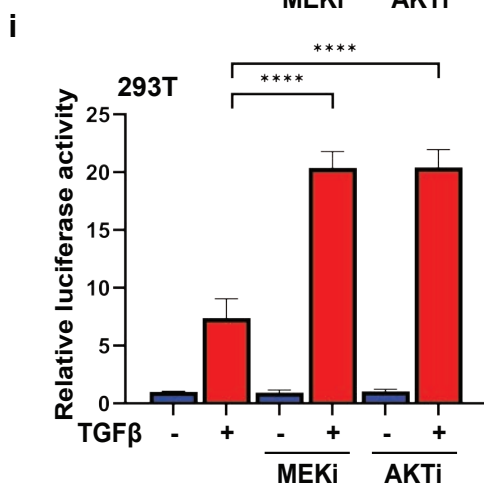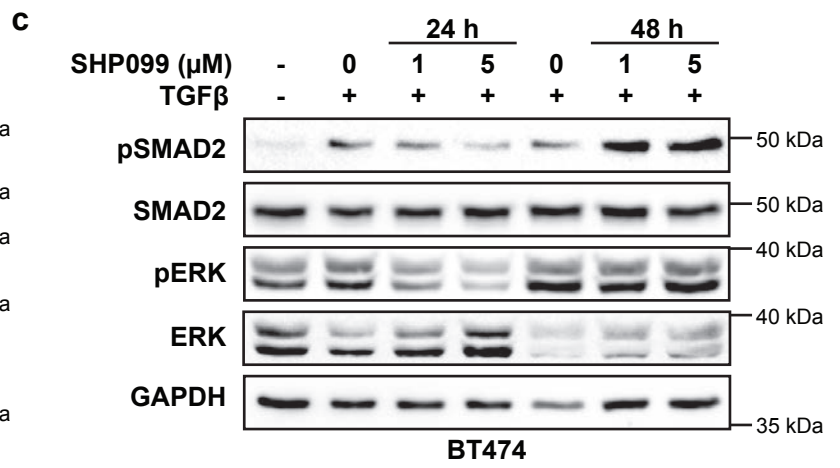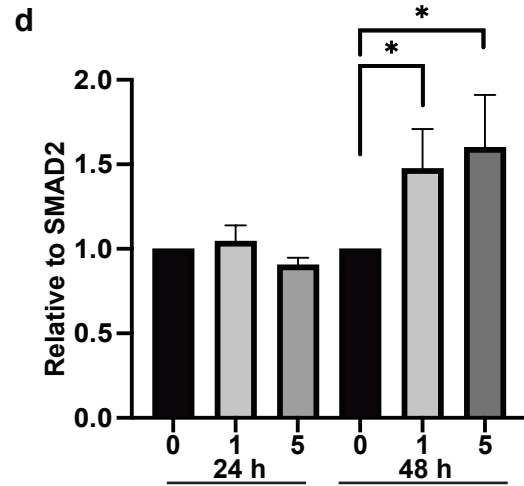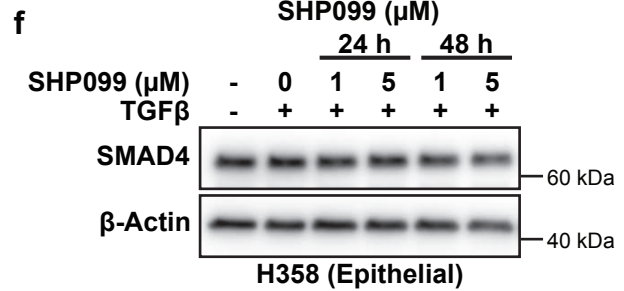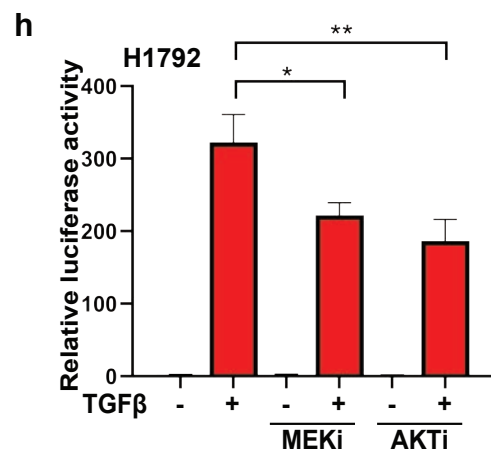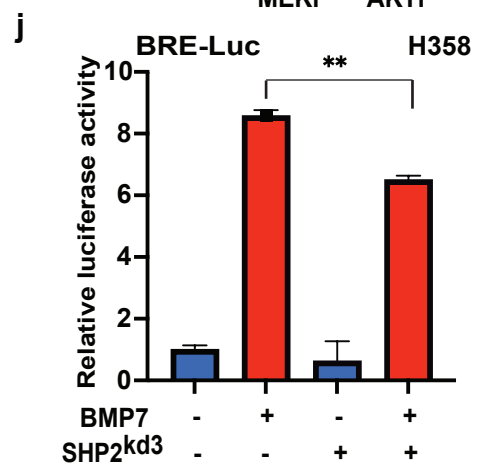

### Supplementary Figure 3. SHP2 inhibition activates SMAD2 in breast cancer cell lines.

(a) MDA-MB-436 cells treated with either TGF $\beta$  (100 pM) or SHP099 (1 or 5  $\mu$ M) for 24 hours. Lysates were probed with indicated antibodies. (b) Quantification of panel A comparing phospho-SMAD2 to corresponding SMAD2. Density was evaluated with IMAGE J. Bars represent mean  $\pm$  SD from three independent experiments. A two-tailed Student's t test compares the treated populations. \*P  $\leq$  0.05. (c) BT474 cells treated with either TGF $\beta$  (100 pM) or SHP099 (1 or 5  $\mu$ M) or both for 24 or 48 hours. Lysates were probed with indicated antibodies. (d) Quantification of panel C comparing phospho-SMAD2 to corresponding SMAD2. Density was evaluated with IMAGE J. Bars represent mean  $\pm$  SD from 3 independent experiments. A two-tailed student's t test compares the treated populations. \*P  $\leq$  0.05. (e) LU65 cells treated with either TGF $\beta$  (100 pM) or SHP099 (1 or 5  $\mu$ M) or both for 24 or 48 hours. Lysates were probed with indicated antibodies. (f) H358 cells treated with either TGF $\beta$  (100 pM) or SHP099 (1 or 5  $\mu$ M) or both for 24 or 48 hours. Lysates were probed with indicated antibodies. (g) TGF $\beta$  responsive luciferase (CAGA luciferase) of H358 cells stimulated overnight with TGF $\beta$  (100 pM) or MEK162 (1  $\mu$ M) or GDC-0068 (1  $\mu$ M) or in combination. Lysates were collected and luciferase measured by a luminometer. Error bars represent SD of triplicates. Experiments are representative of three independent experiments. (h) TGF $\beta$  responsive luciferase (CAGA luciferase) of H1792 cells stimulated overnight with TGF $\beta$  (100 pM) or MEK162 (1  $\mu$ M) or GDC-0068 (1  $\mu$ M) or in combination. Lysates were collected and luciferase measured by a luminometer. Error bars represent SD of triplicates. Experiments are representative of three independent experiments. \*P  $\leq$  0.05, \*\*P  $\leq$  0.01 as determined by Student's t-test. (i) TGF $\beta$  responsive luciferase (CAGA luciferase) of 293T cells stimulated overnight with TGF $\beta$  (100 pM) or MEK162 (1  $\mu$ M) or GDC-0068 (1  $\mu$ M) or in combination. Lysates were collected and luciferase measured by a luminometer. Error bars represent SD of triplicates. Experiments are representative of three independent experiments. \*\*\*\*P  $\leq$  0.0001 as determined by Student's t-test. (j) TGF $\beta$  responsive luciferase (CAGA luciferase) of H358 cells transfected with shSHP2 or a hairpin targeting GFP were stimulated where indicated with BMP7 (50  $\mu$ g/ $\mu$ l) overnight before lysis. Error bars represent SD of triplicates. Experiments are representative of three independent experiments. \*\*P  $\leq$  0.01 as determined by Student's t-test.

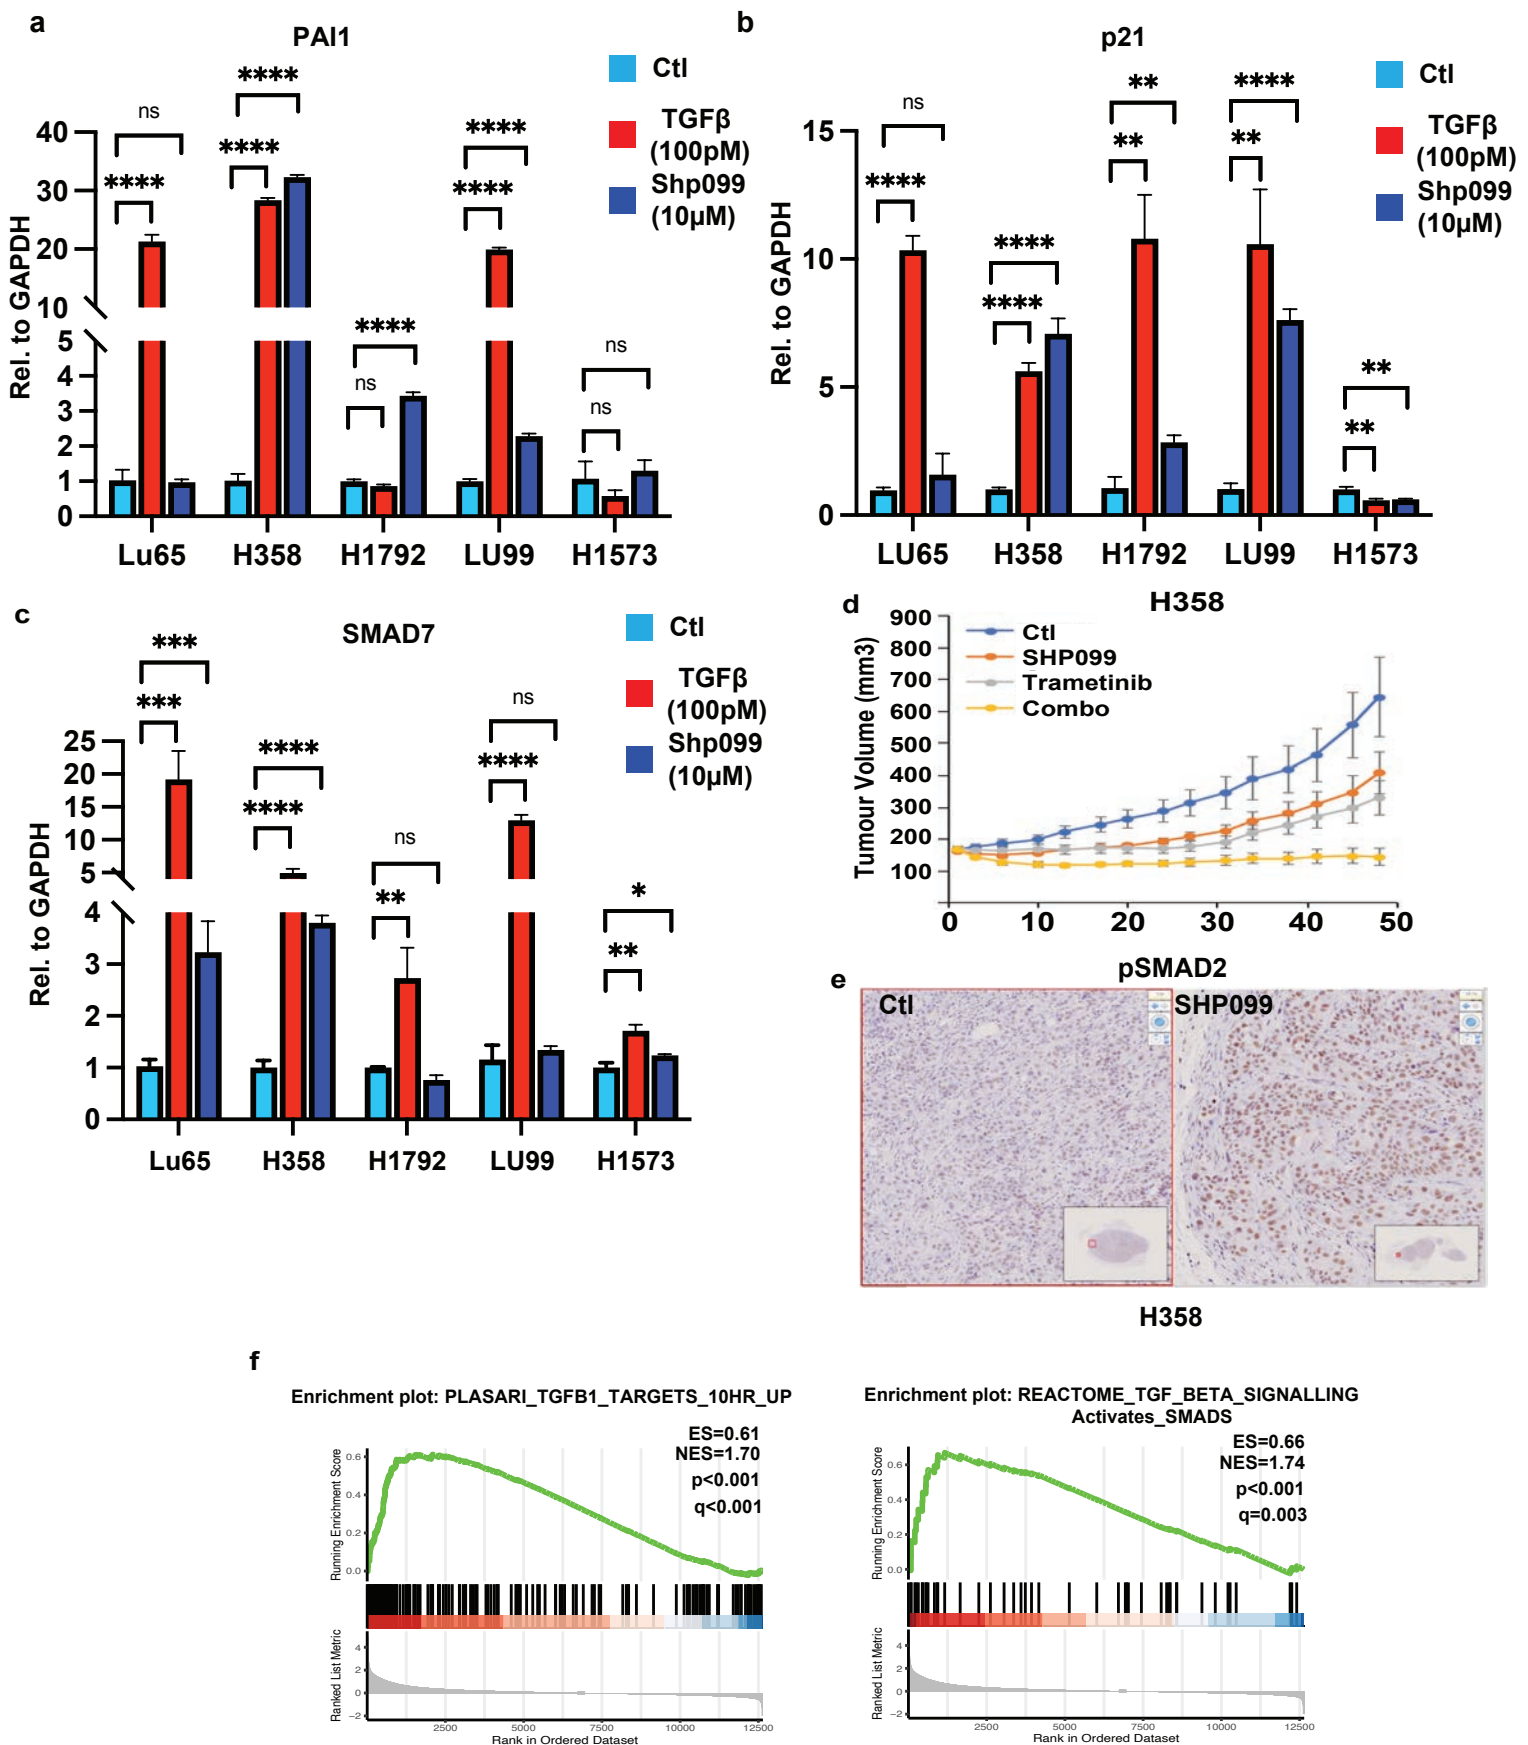

**Supplementary Figure 4. SHP2 induces TGFβ pathway activation in KRAS mutant lung cancer.**

(a-c) LU65, H358, H1792, or LU99 cells were stimulated with TGFβ (100 pM) or SHP099 (10 μM) as indicated for 3 hours. PAI1 (a), p21 (b), or SMAD7 (c) mRNA levels relative to GAPDH are shown as evaluated by quantitative real time PCR. Data are shown as the mean ± SD of triplicate samples from a representative experiment performed two times. \*P ≤ 0.05, \*\*P ≤ 0.01, \*\*\*P ≤ 0.001, \*\*\*\*P ≤ 0.0001 as determined by Student's t-test. (d) Quantification of nude mice bearing xenograft tumours of H358 cells treated with SHP099 (75 mg/kg), Trametinib (0.3 mg/kg), or the combination for 50 days. Points indicate mean tumour volume, bars, SE. (e) Tumours were harvested at day 50 and analyzed by immunohistochemistry for the phosphorylation of SMAD2. Representative images are shown. (f) Gene set enrichment analysis of TGFβ (PLASARI\_TGFB1\_TARGETS\_10HR\_UP and REACTOME\_TGF\_BETA\_SIGNALLING\_ACTIVATES\_SMADS,) gene set signatures, extrapolated from the GSE109270 data set derived from five vehicle- and seven SHP099-treated patient derived xenograft tumours. Enrichment scores (ESs), normalized enrichment scores (NESs), P values, and FDR are reported.

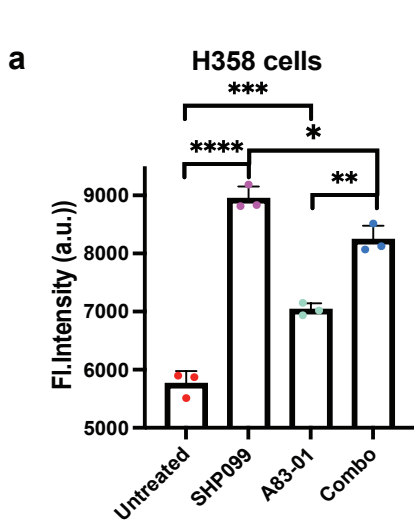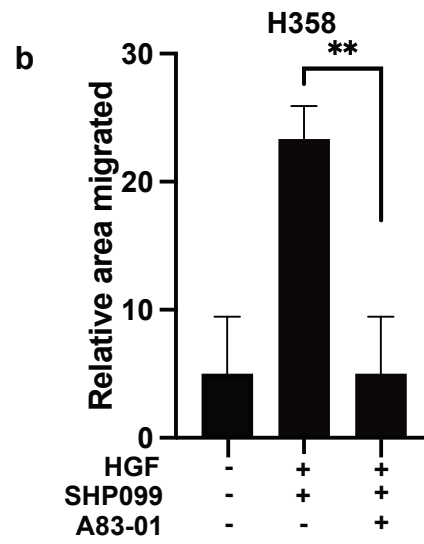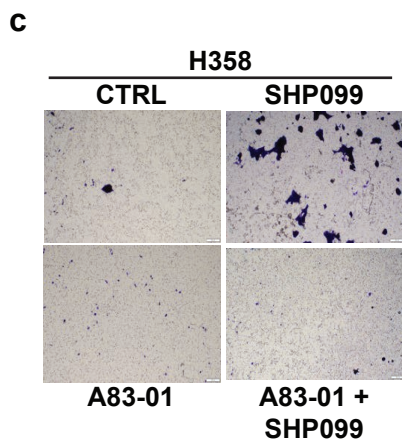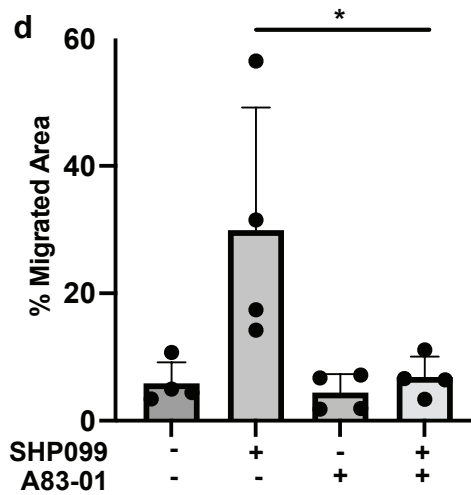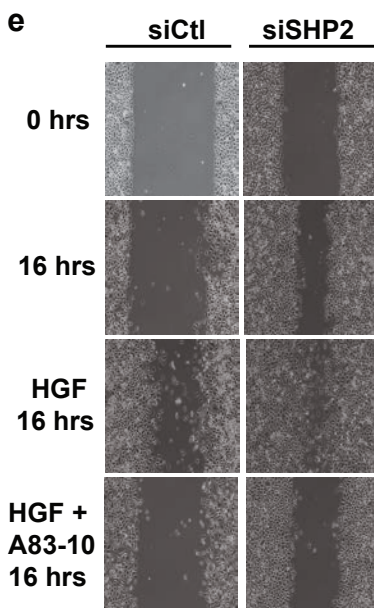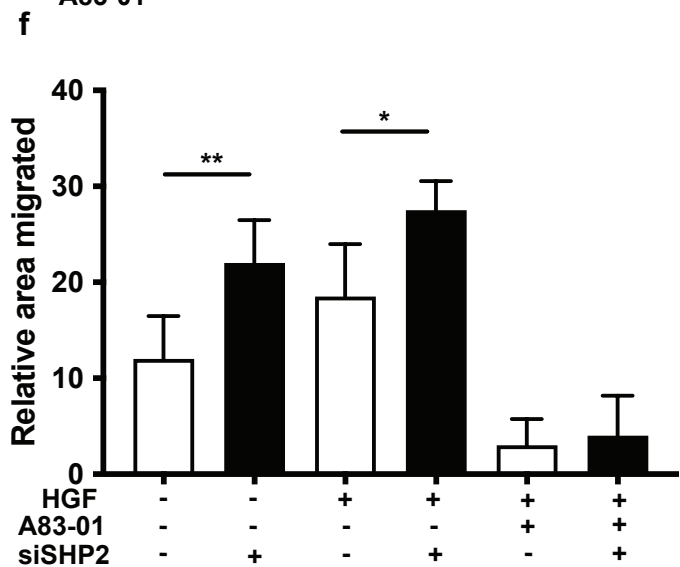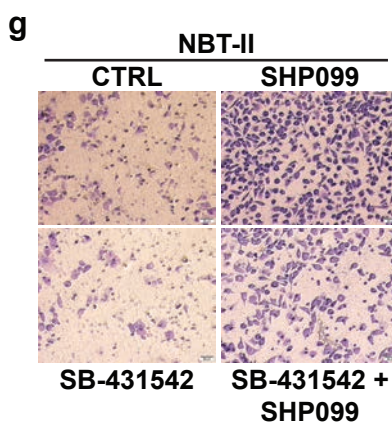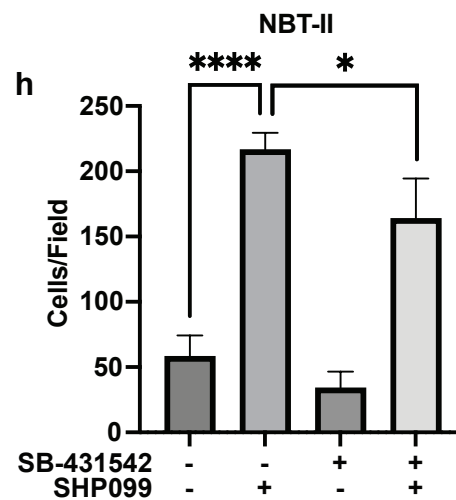

## Supplementary Figure 5. TGF $\beta$ inhibition circumvents SHP2 inhibitor induced TGF $\beta$ responses.

(a) Quantification of H358 cells similar to figure 5b,c. Control (red), SHP099 (10  $\mu$ M) (purple), A83-01 (10  $\mu$ M) (green) or the combination A83-01 (10  $\mu$ M) plus SHP099 (10  $\mu$ M) (blue). Error bars in A represent SD of three independent experiments. \* $P \leq 0.05$ , \*\* $P \leq 0.01$ , \*\*\* $P \leq 0.001$ , \*\*\*\* $P \leq 0.0001$  as determined by Student's t-test. (b) Migration assay in H358 cells similar to 5E. Percentage of migrated area was determined with respect to control (0 h) and a graph was plotted. \*\* $P \leq 0.01$  using Student's t-test. Data are mean  $\pm$  SD from three random fields. Data are representative of three independent experiments with similar results. (c) Transwell assay of H358 cells treated with SHP099 (10  $\mu$ M), or in combination with or without A83-01 (10  $\mu$ M) for 16 hours prior to fixation and crystal violet staining (scale bars 100  $\mu$ m). (d) Graph represents percent number of migrated cells taken from four different random fields from panel (c). Data are mean  $\pm$  SD of triplicate samples from a representative experiment performed three times. \* $P \leq 0.05$  using Student's t-test. (e) NBT-II cells transduced with siRNA targeting SHP2 or relevant controls were plated for scratch assay and treated with either DMSO, HGF (8  $\mu$ M), or HGF (8  $\mu$ M) in combination with A-83-01 (10  $\mu$ M), panels show migration at 0 and 16 hours. Representative images are shown (scale bars, 200  $\mu$ m). (f). Graph extrapolated from panel E represents percentage of migrated area determined with respect to control (0 h) and a graph was plotted. \*\* $P < 0.01$  using Student's t-test. Data are mean  $\pm$  SD from three random fields. Data are representative of three independent experiments with similar results. \* $P \leq 0.05$ , \*\* $P \leq 0.01$  as determined by Student's t-test. (g) Transwell assay of NBT-II cells treated with SHP099 (5  $\mu$ M), SB-431542 (10  $\mu$ M), or in combination for 48 hours prior to fixation and crystal violet staining (scale bars 100  $\mu$ m). (h) Graph represents average number of migrated cells taken from 4 different random fields from panel (g). Data are mean  $\pm$  SD of triplicate samples from a representative experiment performed three times. \* $P \leq 0.05$ , \*\*\*\* $P \leq 0.0001$  using Student's t-test..



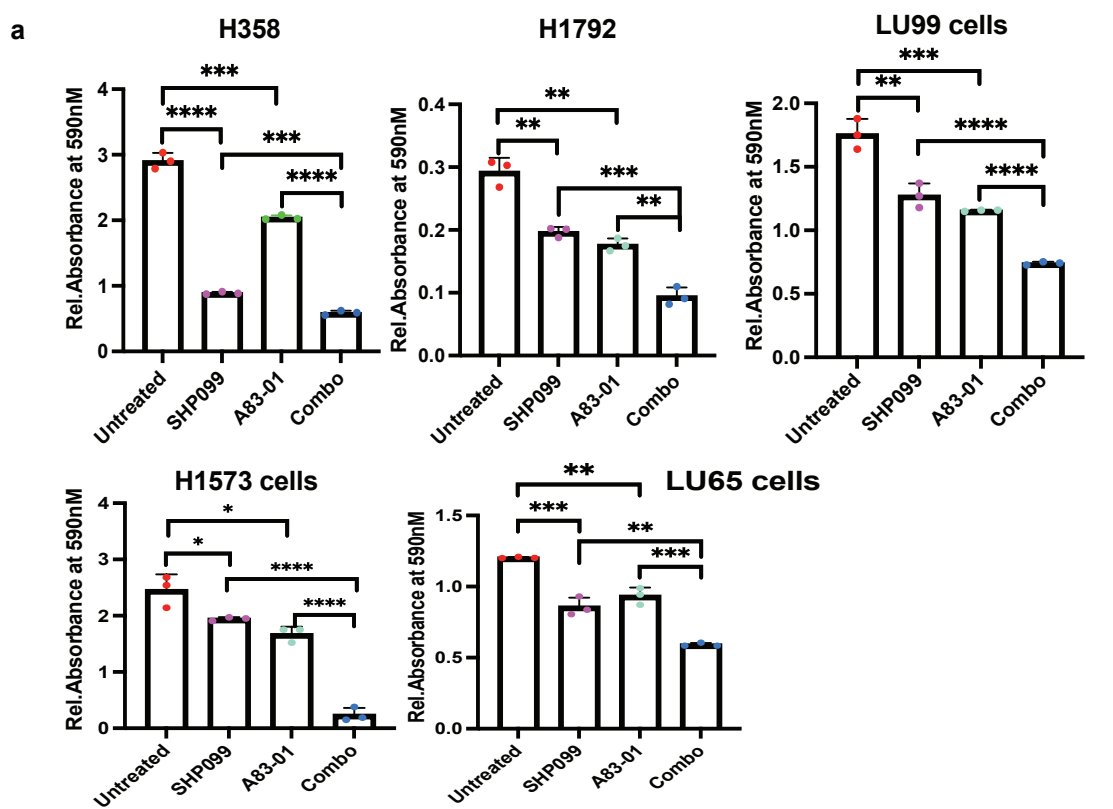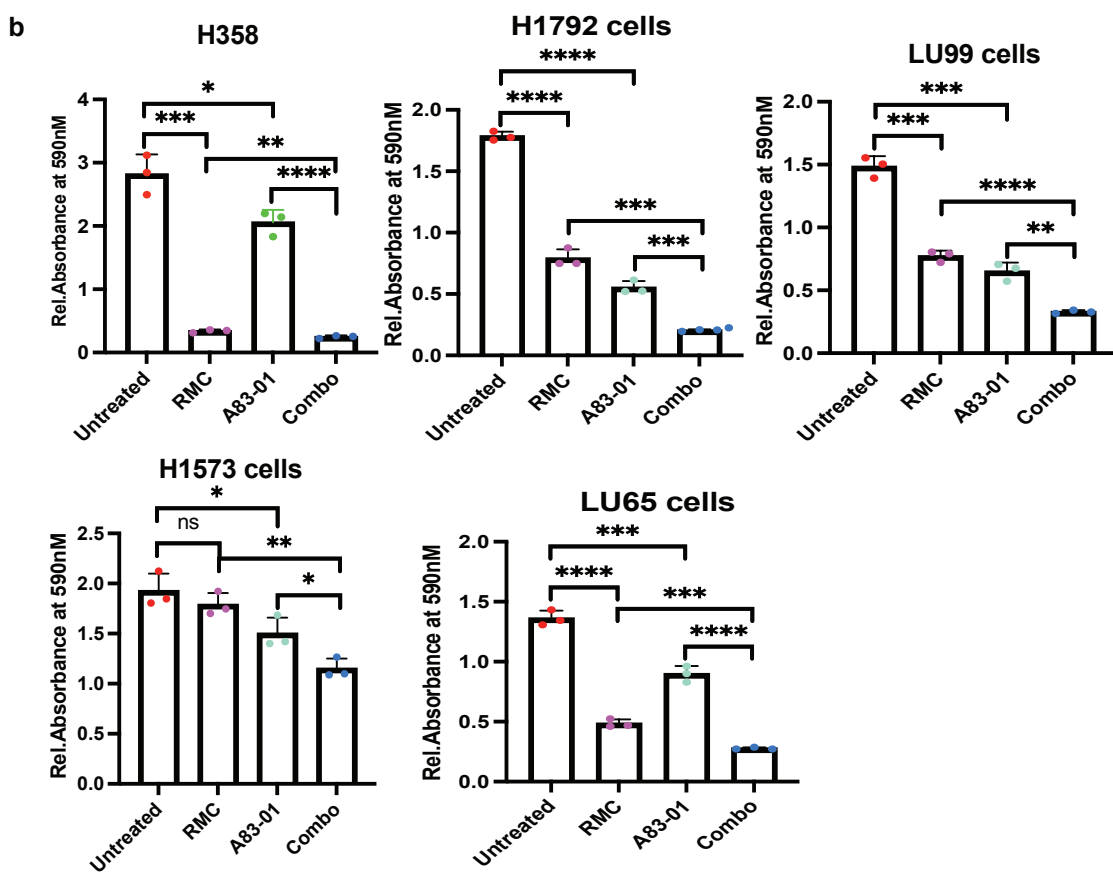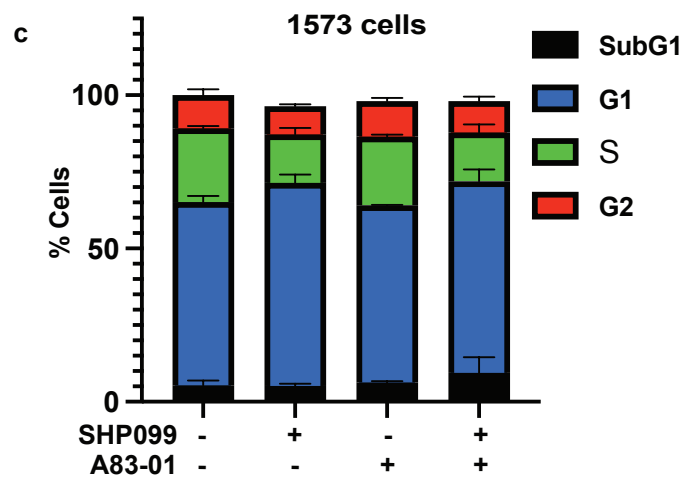

**Supplementary Figure 6. TGF $\beta$  inhibition circumvents SHP2 inhibitor induced TGF $\beta$  responses.**

(a) Quantification of figures 5H. Data are mean  $\pm$  SD from three independent experiments with similar results. (b) Quantification of figures 5H. Data are mean  $\pm$  SD from three independent experiments with similar results. (c) Stacked bar graphs showing the percentage of cells in different phases of the cell cycle. Percentage of cells in subG1, G1, S, and G2 phases was calculated with Flowjo software. Results represent mean values from three independent experiments.

**a**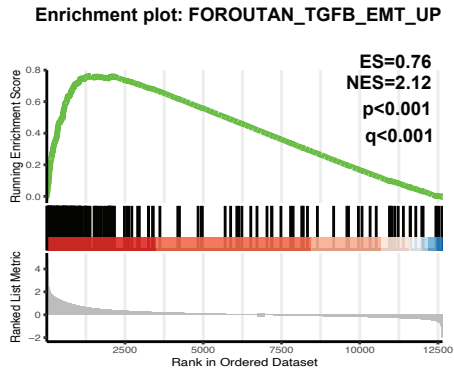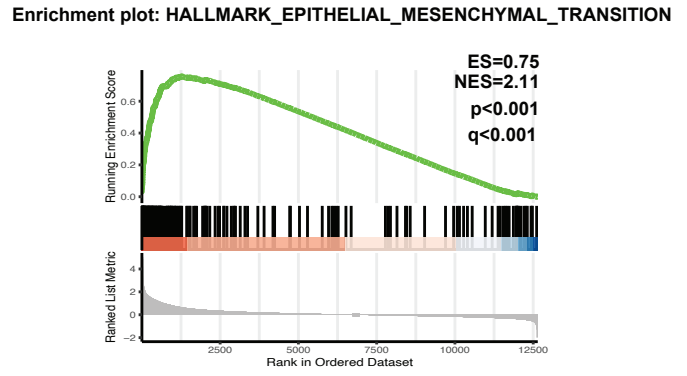

### Supplementary Figure 7. SHP099 induces EMT

(a) Gene set enrichment analysis of EMT (FOROUTAN\_TGFB\_EMT\_UP, AND HALLMARK\_EPITHELIAL\_MESENCHYMAL\_TRANSITION) gene set signatures, extrapolated from the GSE109270 data set derived from five vehicle- and seven SHP099-treated patient-derived xenograft tumours. Enrichment scores (ESs), normalized enrichment scores (NESs), P values, and FDR are reported.

# Supplementary Figure 8: Raw data images.

Figure 1D

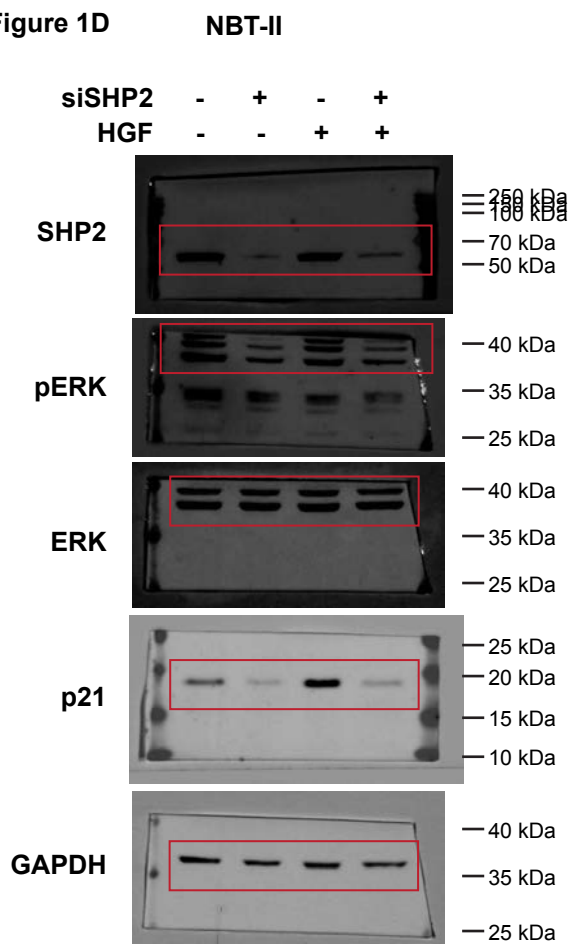

Figure 1I

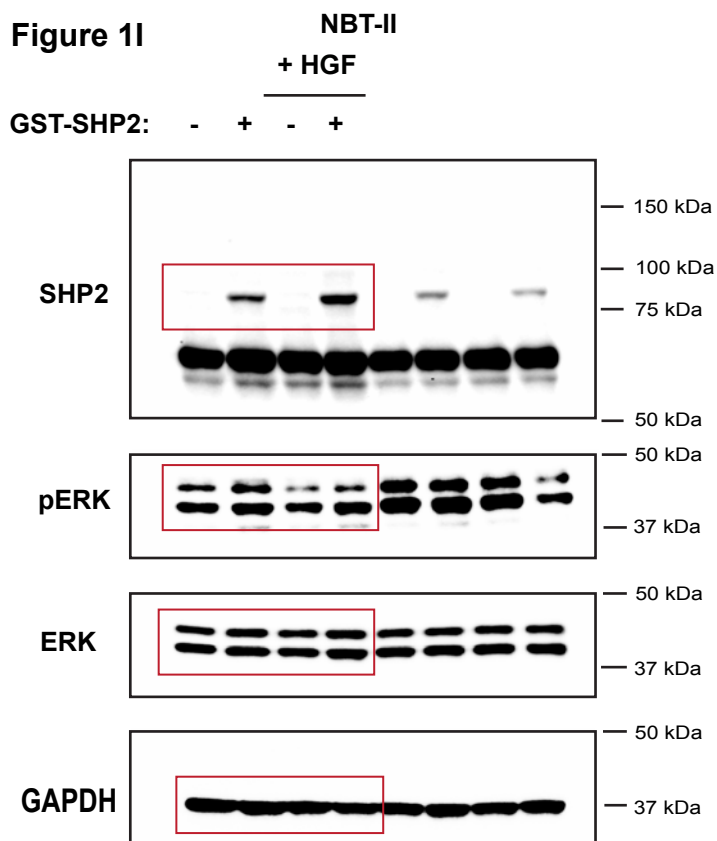

Figure 2C

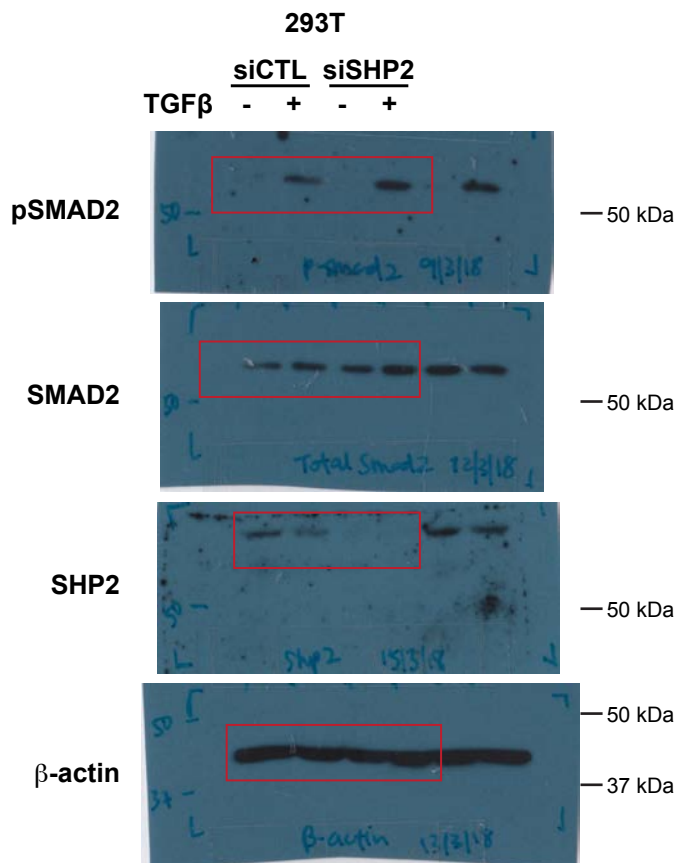

Figure 2E

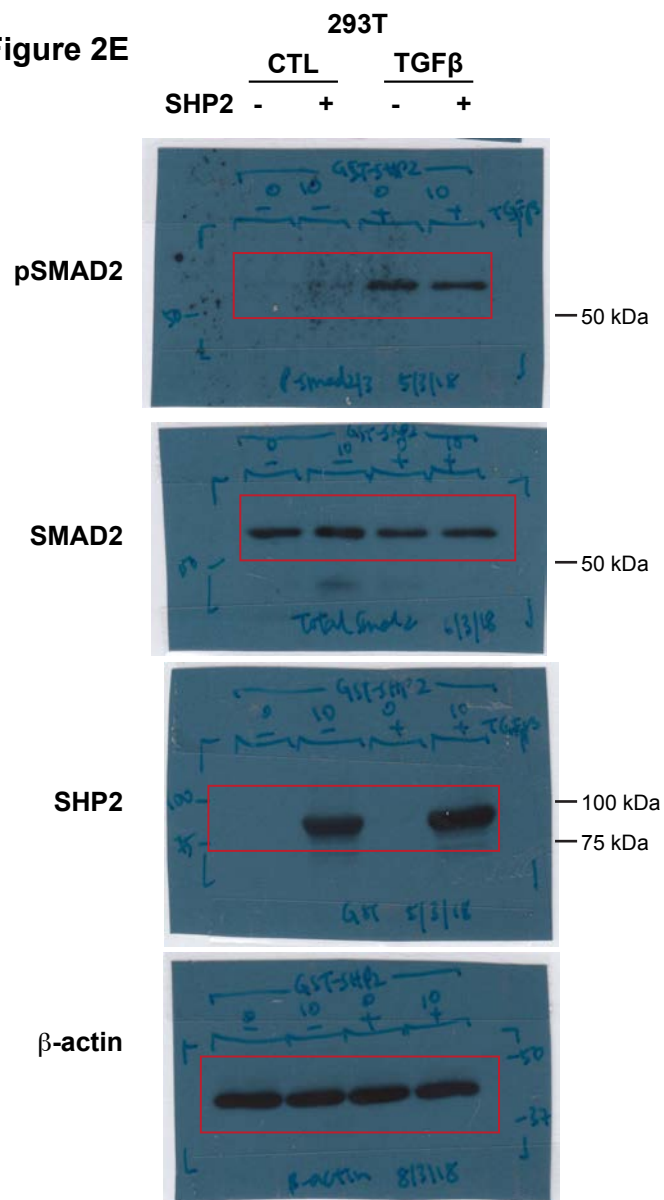

Figure 2G

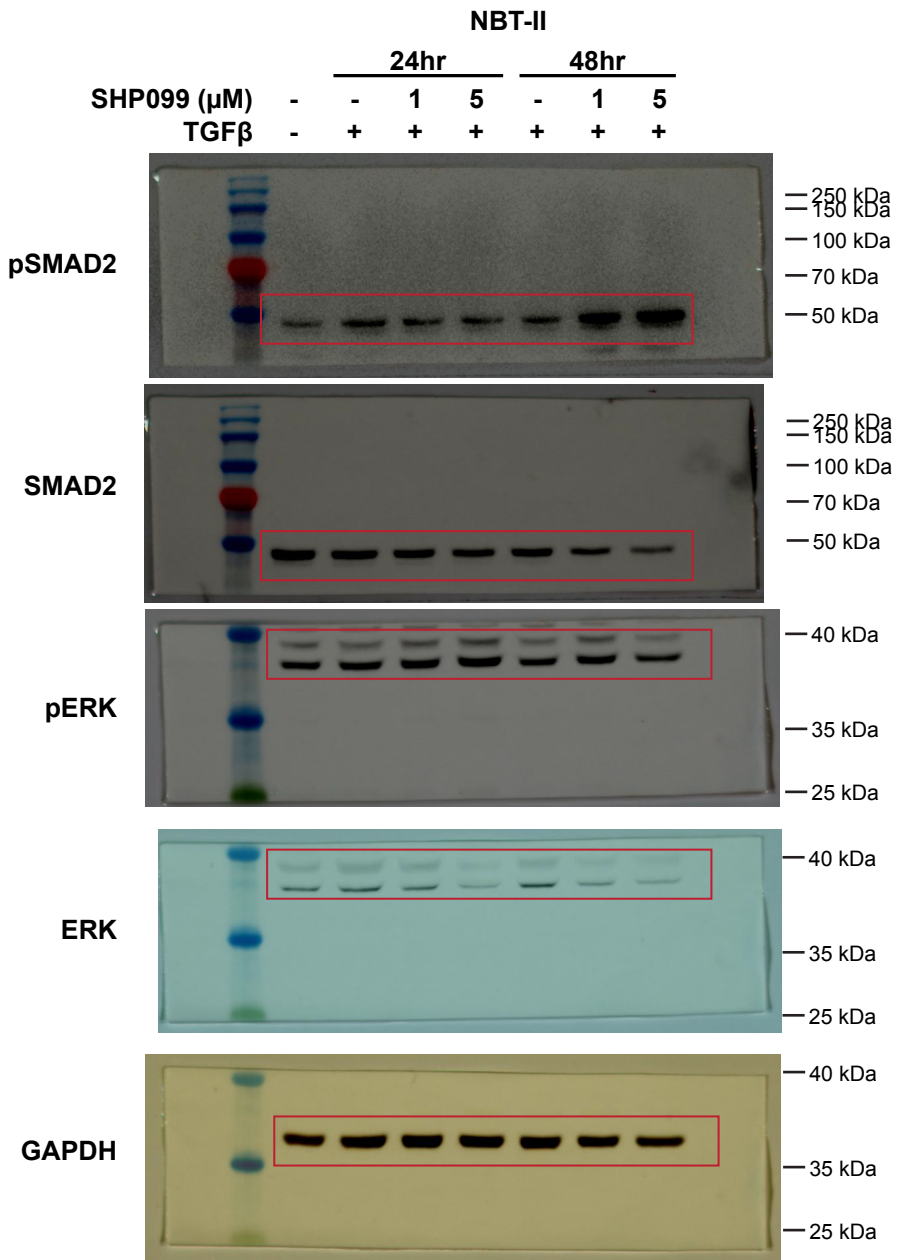

Figure 4A

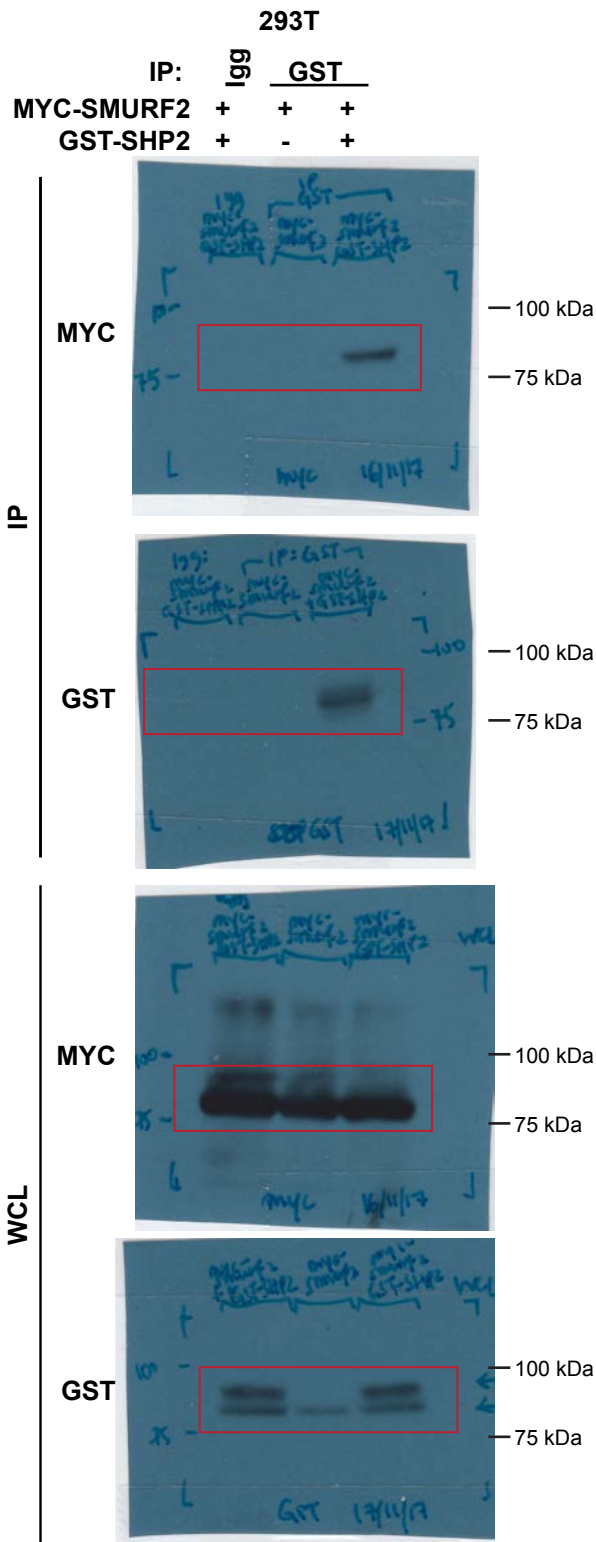

Figure 4B

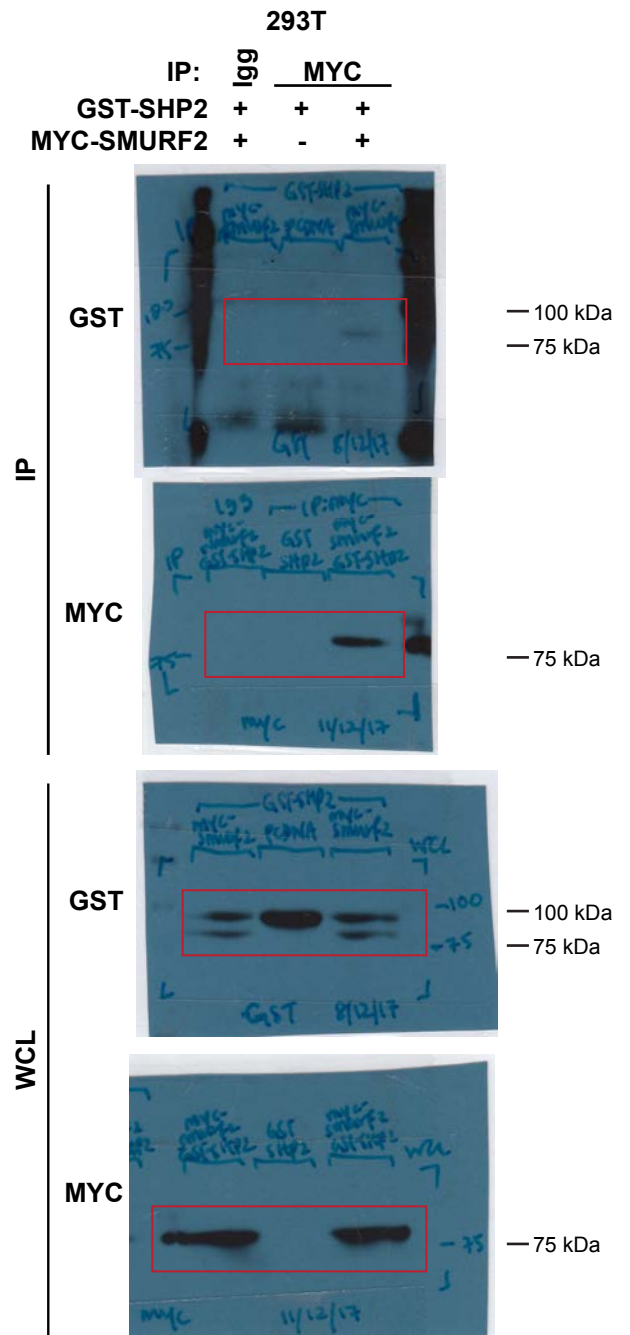

Figure 4C

|            | 293T |   |   |   |   |
|------------|------|---|---|---|---|
| SHP2       | -    | - | - | - | + |
| MYC-SMURF2 | -    | + | - | + | + |
| FL-c-SRC   | -    | - | + | + | + |

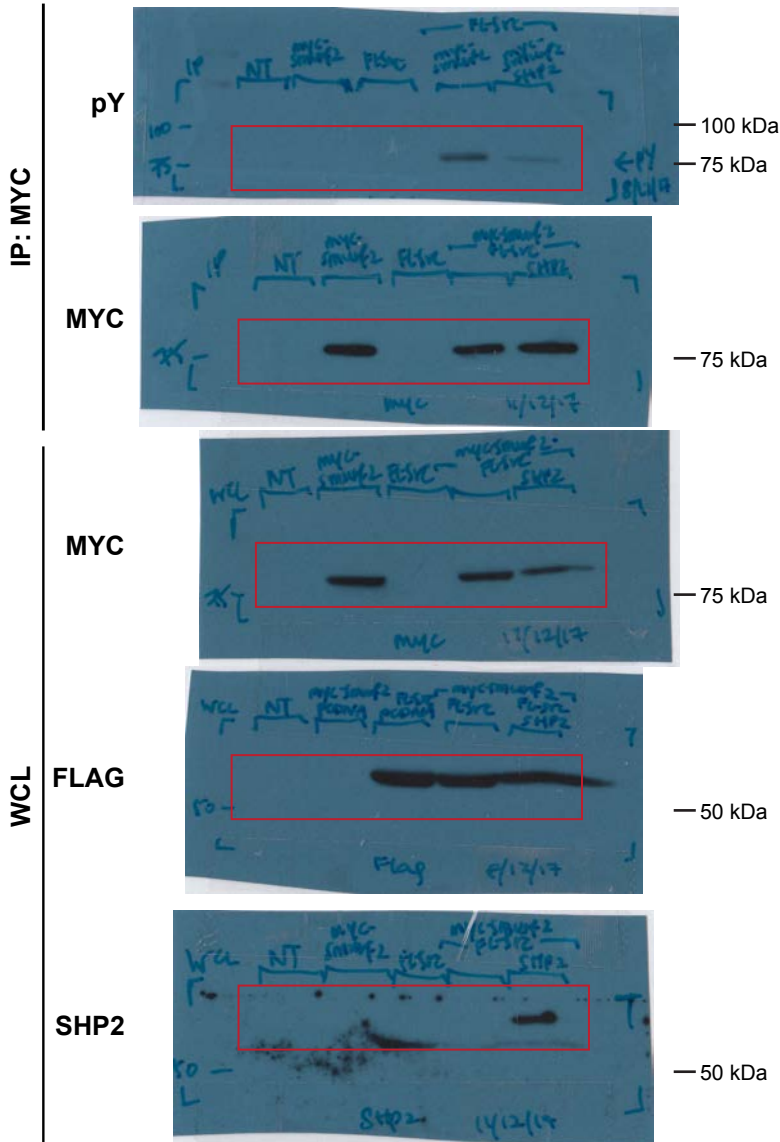

**Figure 4D**

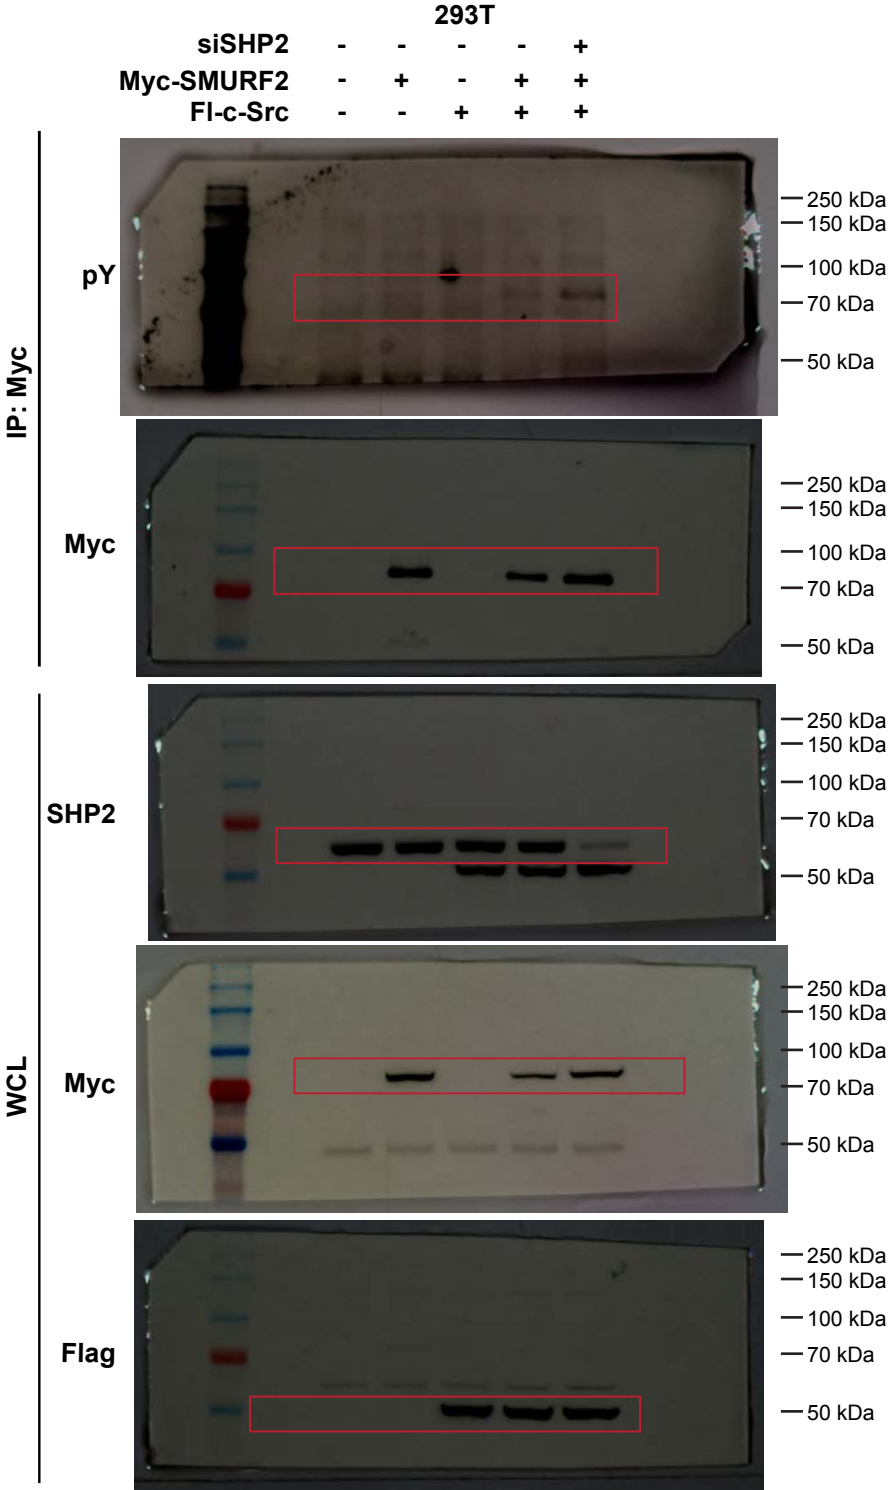

Figure 4F

|               | 293T |   |   |   |   |   |
|---------------|------|---|---|---|---|---|
| SHP2          | -    | - | - | + | - | + |
| MYC-SMURF2 FF | -    | - | - | - | + | + |
| MYC-SMURF2    | -    | + | + | + | - | - |
| FI-SRC        | -    | - | + | + | - | + |

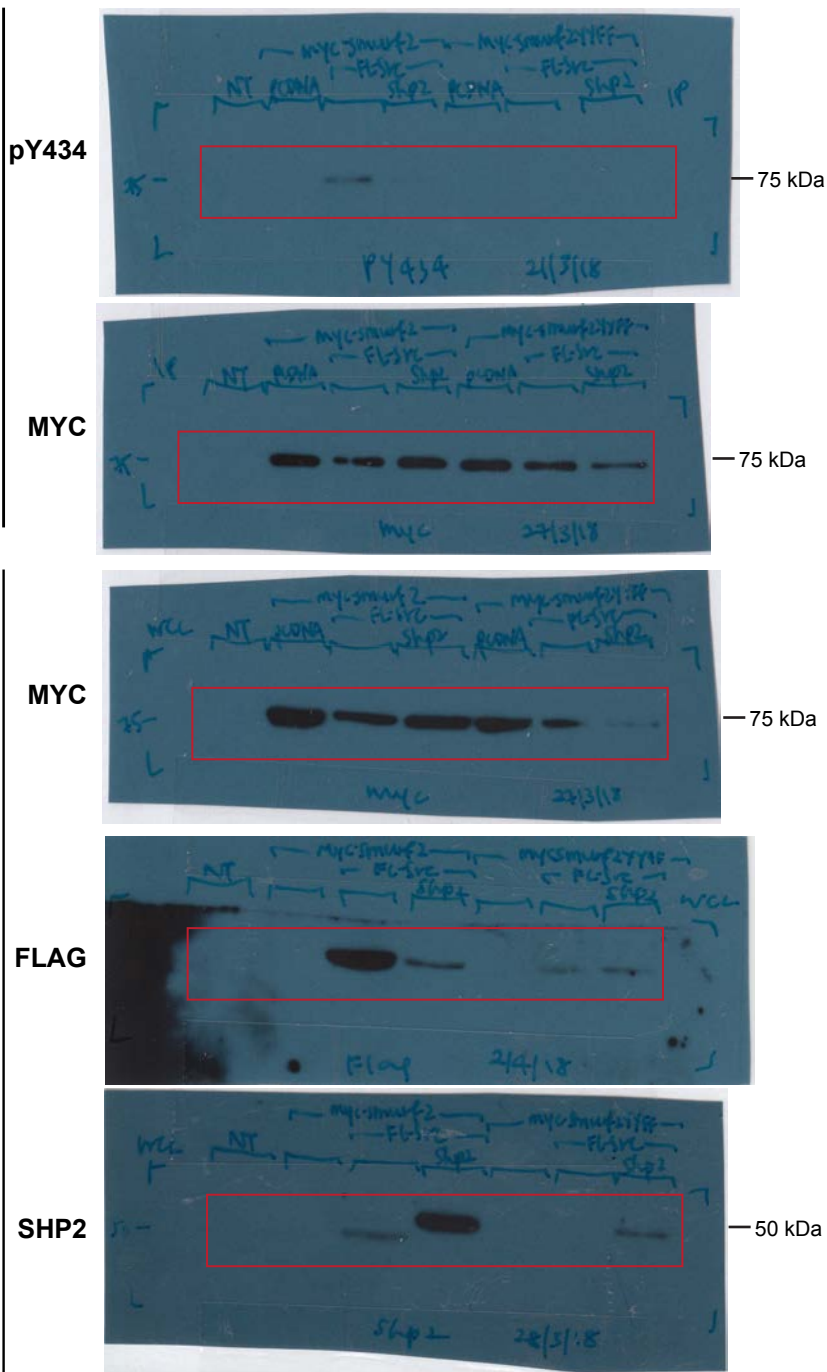

Figure 4E

|               | 293T |   |   |   |   |   |
|---------------|------|---|---|---|---|---|
| SHP2          | -    | - | - | + | - | + |
| MYC-SMURF2 FF | -    | - | - | - | + | + |
| MYC-SMURF2    | -    | + | + | + | - | - |
| FI-SRC        | -    | - | + | + | - | + |

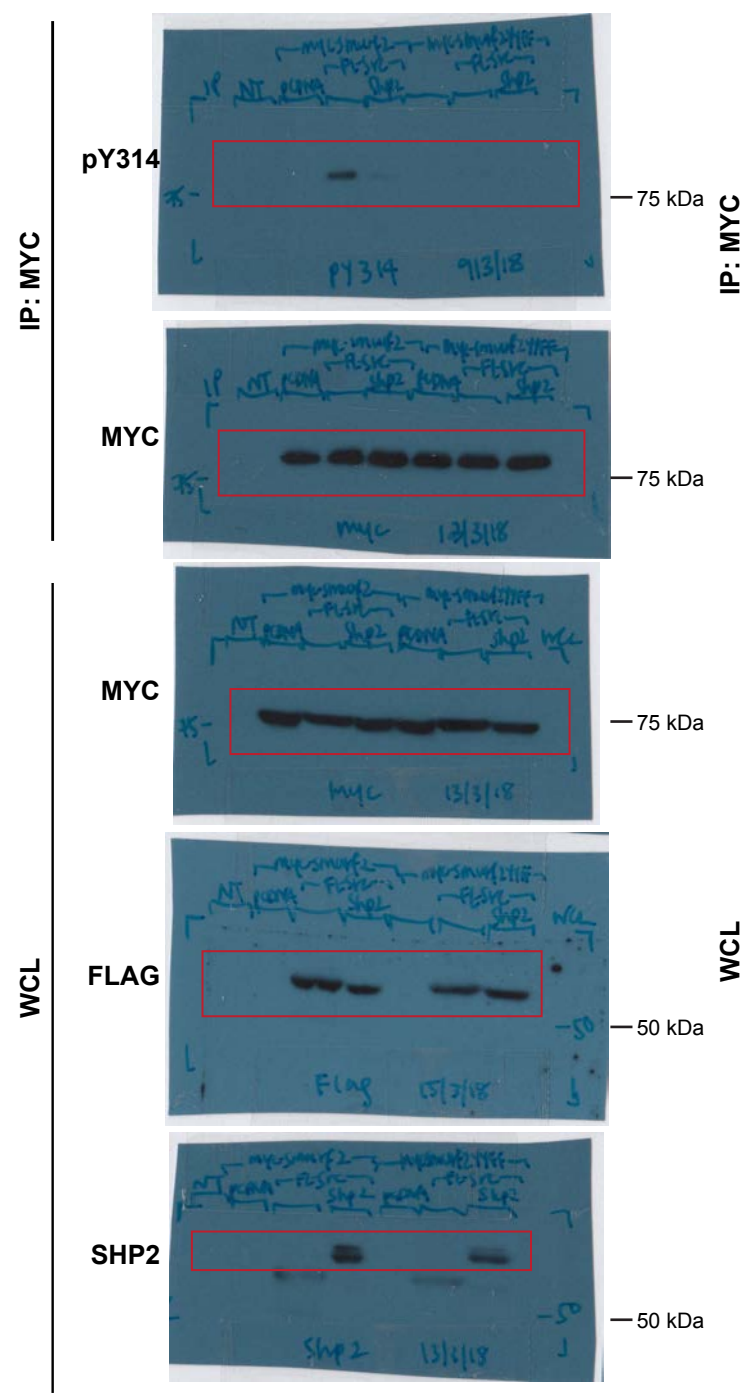



Figure 4G

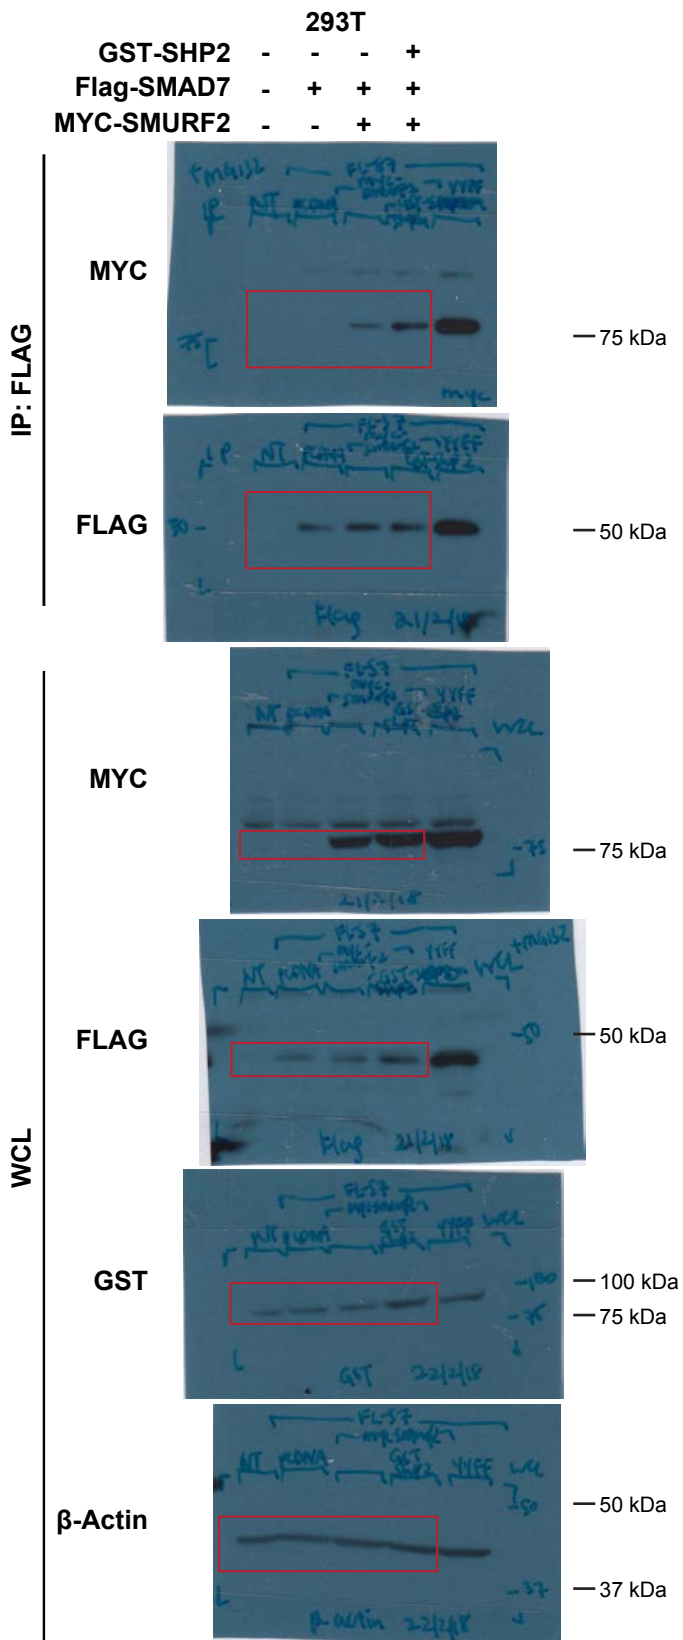

Figure 4H

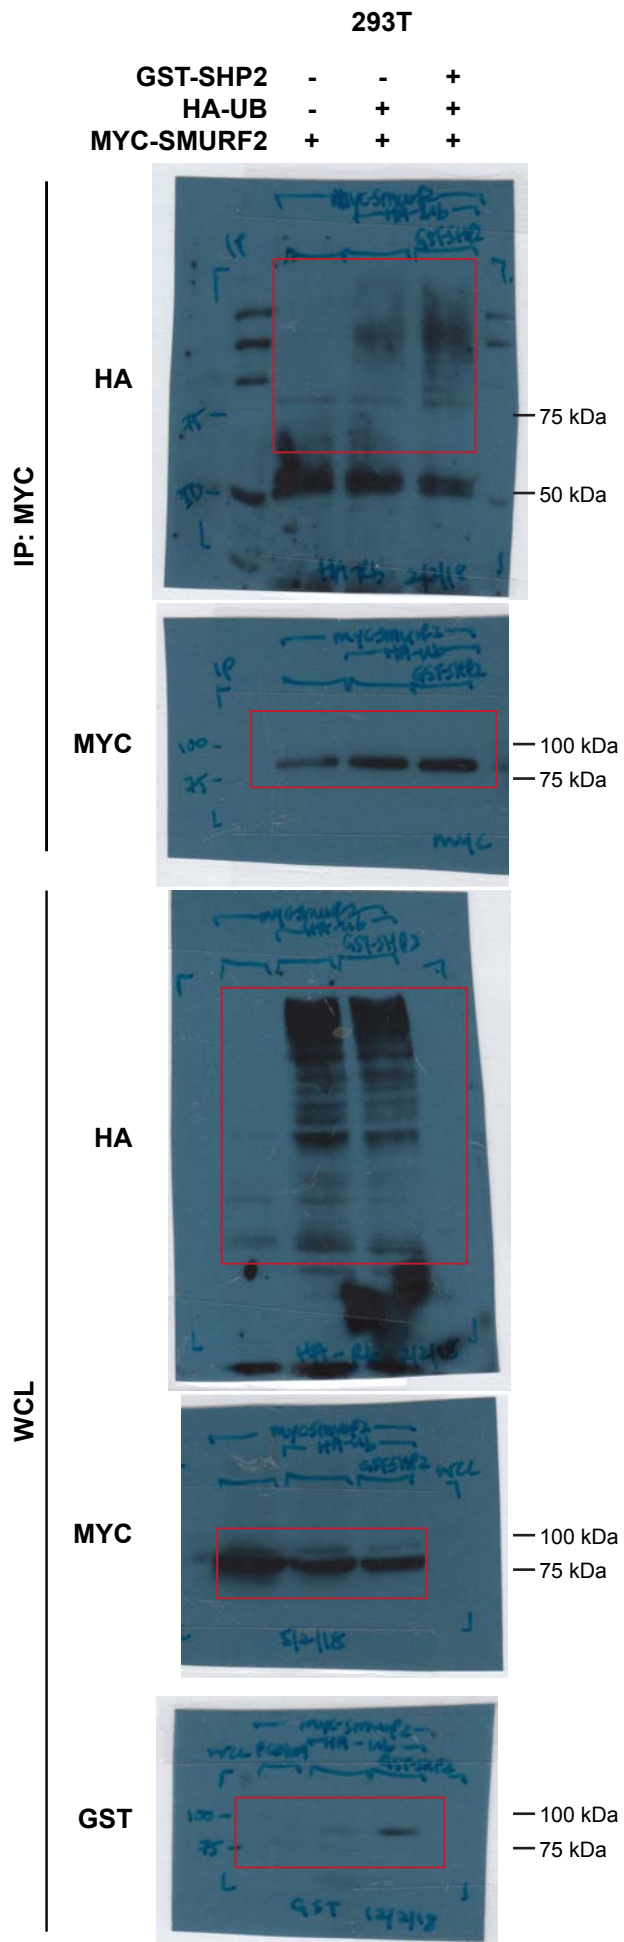

**Figure S1C**

**NBT-II**

|        |   |   |   |   |   |   |   |   |
|--------|---|---|---|---|---|---|---|---|
| siSHP2 | - | + | - | + | - | + | - | + |
| HGF    | - | - | + | + | - | - | + | + |
| MMC    | - | - | - | - | + | + | + | + |

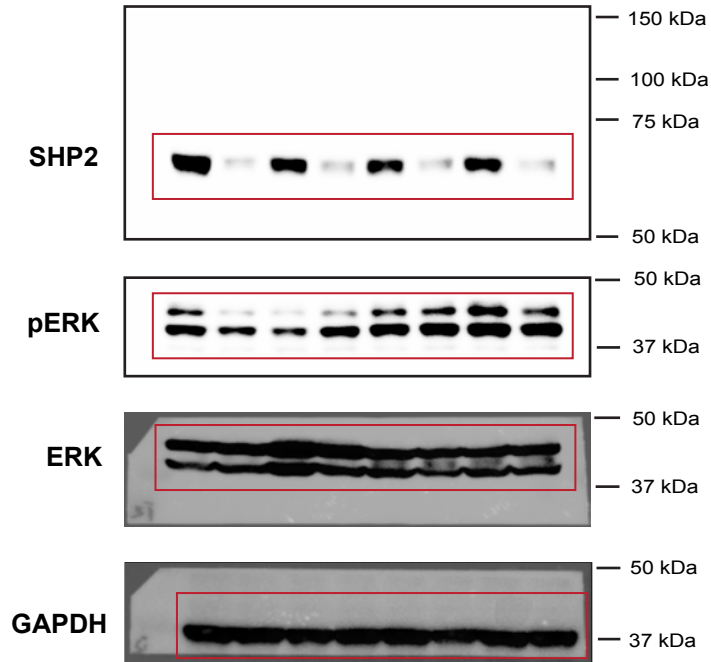

**Figure S3A**

**MDA-MB-436**

|                   |   |   |   |   |
|-------------------|---|---|---|---|
| SHP099 ( $\mu$ M) | - | 0 | 1 | 5 |
| TGF $\beta$       | - | + | + | + |

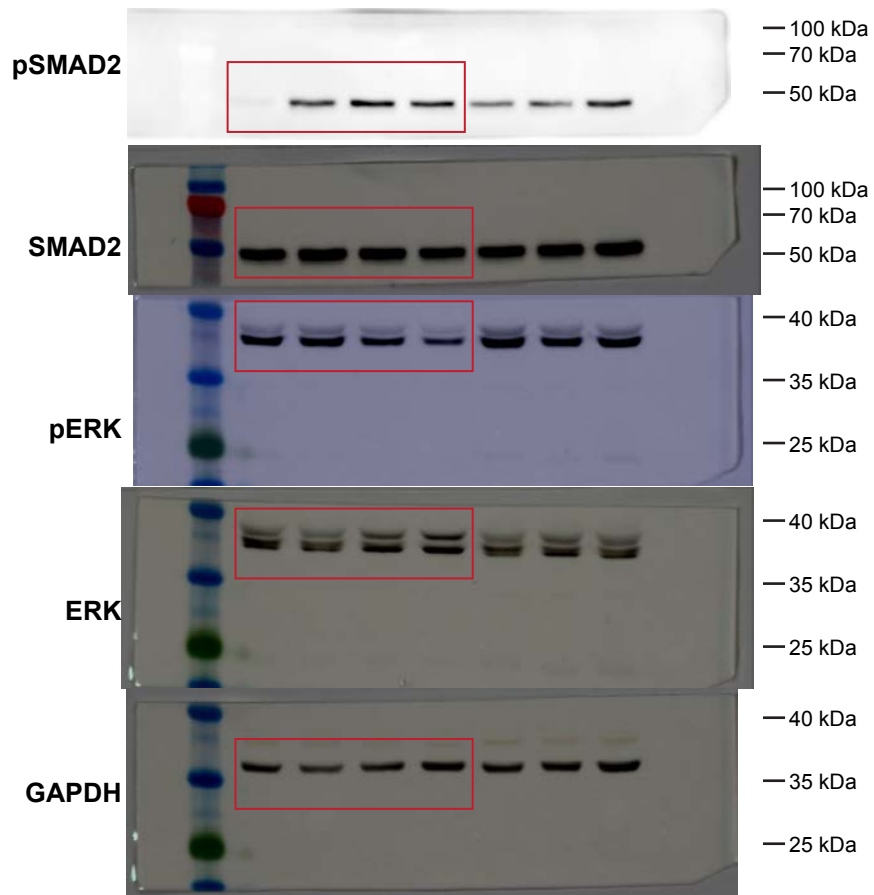

Figure S3C

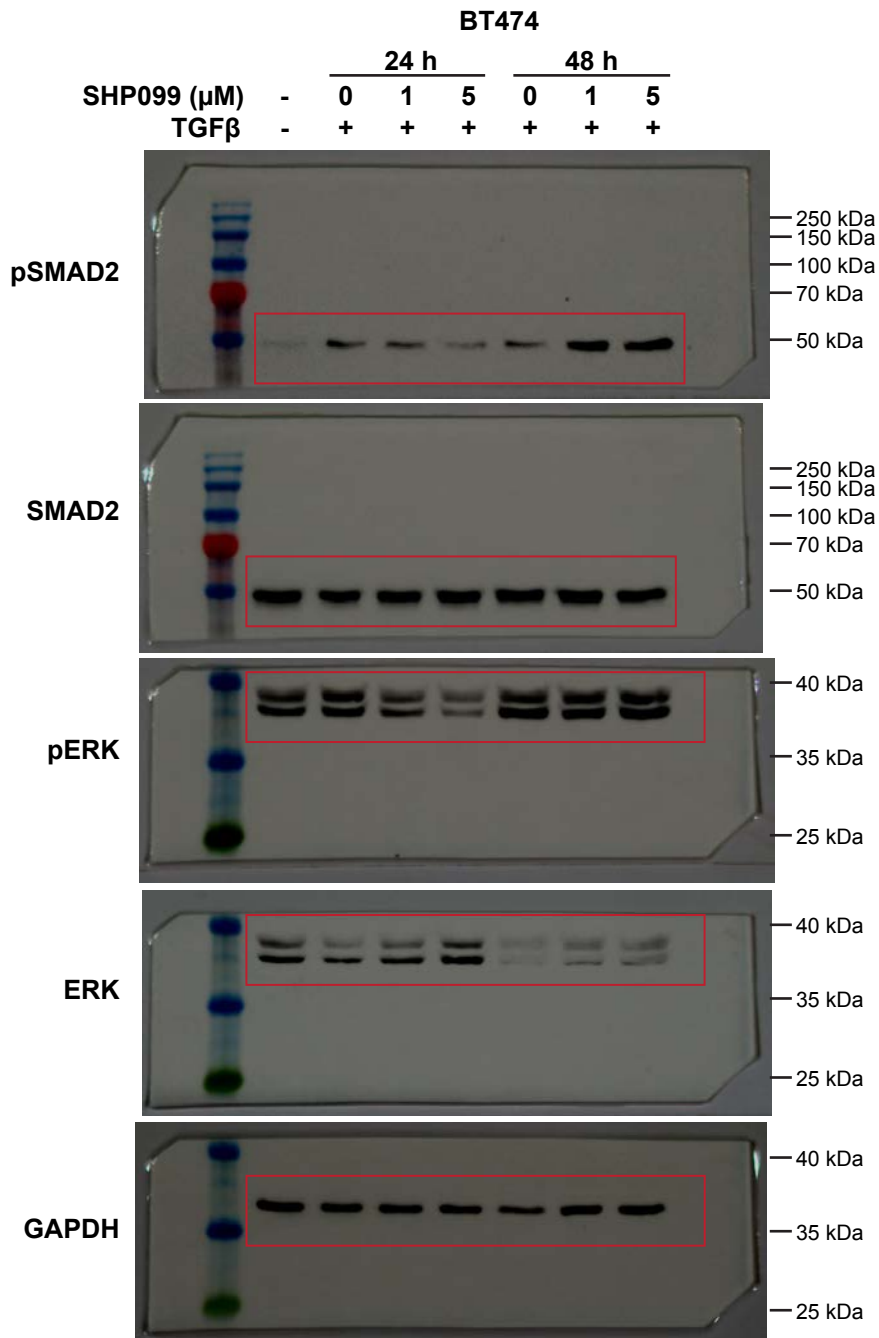

Figure S3E/F

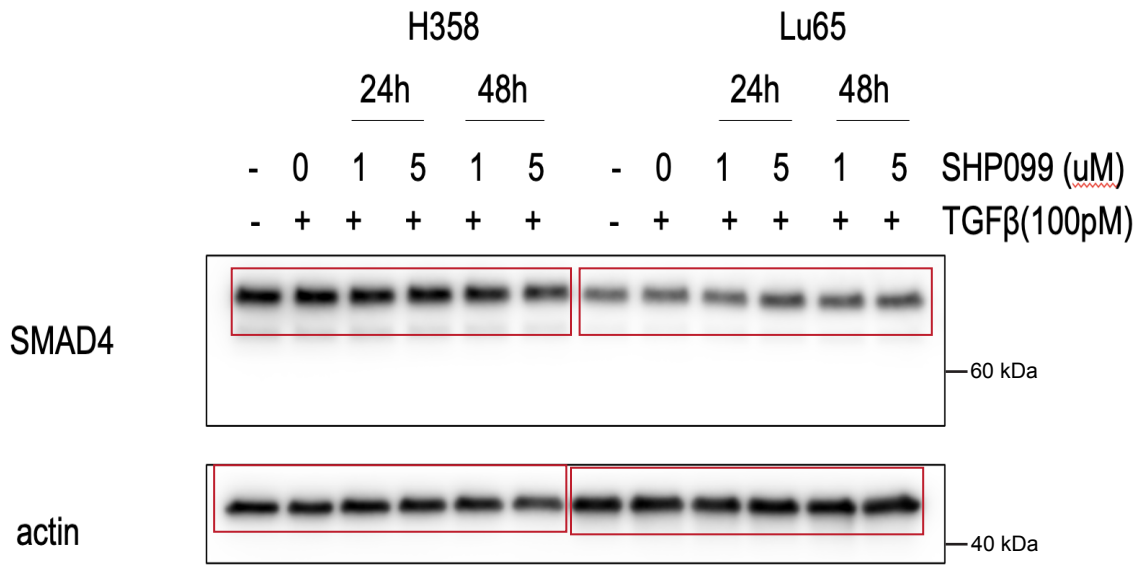

**Supplementary Table 1**

| Gene          | Description                                                                                         | % WHR      |
|---------------|-----------------------------------------------------------------------------------------------------|------------|
| Atp7a         | ATPase, Cu++ transporting, alpha polypeptide                                                        | 169        |
| Dusp3         | dual specificity phosphatase 3                                                                      | 169        |
| Ppp2r2b       | protein phosphatase 2 (formerly 2A), regulatory subunit B (PR 52), beta isoform                     | 163        |
| Atp7b         | ATPase, Cu++ transporting, beta polypeptide                                                         | 156        |
| Ppp2r2c       | protein phosphatase 2 (formerly 2A), regulatory subunit B, gamma isoform                            | 150        |
| Ptpn13        | protein tyrosine phosphatase, non-receptor type 13                                                  | 149        |
| LOC499736     | similar to Dual specificity protein phosphatase 14 (Mitogen-activated protein kinase phosphatase 6) | 148        |
| Dut           | deoxyuridine triphosphatase                                                                         | 147        |
| Ppp1r3c       | protein phosphatase 1, regulatory (inhibitor) subunit 3C                                            | 146        |
| <b>Ptpn11</b> | <b>protein tyrosine phosphatase, non-receptor type 11</b>                                           | <b>146</b> |
| Ppp2r5c       | protein phosphatase 2, regulatory subunit B' gamma isoform                                          | 142        |
| Styx1         | serine/threonine/tyrosine interacting-like 1                                                        | 139        |
| Ptprn2        | protein tyrosine phosphatase, receptor type, N polypeptide 2                                        | 138        |
| Pfkfb2        | 6-phosphofructo-2-kinase/fructose-2,6-biphosphatase 2                                               | 137        |
| Ppp1r9a       | protein phosphatase 1, regulatory (inhibitor) subunit 9A                                            | 135        |
| Psph          | phosphoserine phosphatase                                                                           | 135        |
| Ppp1r12b      | protein phosphatase 1, regulatory (inhibitor) subunit 12B                                           | 134        |
| Dolpp1        | dolichyl pyrophosphate phosphatase 1                                                                | 134        |
| Sbf1          | SET binding factor 1                                                                                | 133        |
| Ptpn23        | protein tyrosine phosphatase, non-receptor type 23                                                  | 133        |
| Pten          | phosphatase and tensin homolog                                                                      | 132        |
| Ptprb         | protein tyrosine phosphatase, receptor type, B                                                      | 132        |
| Fbp2          | fructose-1,6-bisphosphatase 2                                                                       | 131        |
| Ppp4r1        | protein phosphatase 4, regulatory subunit 1                                                         | 131        |
| Pdp2          | pyruvate dehydrogenase phosphatase isoenzyme 2                                                      | 131        |
| Ppm1a         | protein phosphatase 1A, magnesium dependent, alpha isoform                                          | 131        |
| Ppp1ca        | protein phosphatase 1, catalytic subunit, alpha isoform                                             | 131        |
| Lhpp          | phospholysine phosphohistidine inorganic pyrophosphate phosphatase                                  | 131        |
| Ppp1r14d      | protein phosphatase 1, regulatory (inhibitor) subunit 14D                                           | 131        |
| Dusp13        | dual specificity phosphatase 13                                                                     | 130        |
| Ptprf         | protein tyrosine phosphatase, receptor type, F                                                      | 130        |
| Ppef1         | protein phosphatase, EF-hand calcium binding domain 1                                               | 130        |
| Ptpro         | protein tyrosine phosphatase, receptor type, O                                                      | 129        |
| Inpp4b        | inositol polyphosphate-4-phosphatase, type II                                                       | 129        |
| Ptpn14        | protein tyrosine phosphatase, non-receptor type 14                                                  | 128        |
| Ppp2cb        | protein phosphatase 2 (formerly 2A), catalytic subunit, beta isoform                                | 128        |
| Phospho1      | phosphatase, orphan 1                                                                               | 128        |
| Ppm1g         | protein phosphatase 1G (formerly 2C), magnesium-dependent, gamma isoform                            | 127        |
| Dusp6         | dual specificity phosphatase 6                                                                      | 127        |
| Ppp2r4        | protein phosphatase 2A activator, regulatory subunit 4                                              | 127        |
| Enpp1         | ectonucleotide pyrophosphatase/phosphodiesterase 1                                                  | 126        |
| Ptpn21        | protein tyrosine phosphatase, non-receptor type 21                                                  | 126        |
| G6pc          | glucose-6-phosphatase, catalytic subunit                                                            | 125        |
| Dusp19        | dual specificity phosphatase 19                                                                     | 125        |
| Ppap2a        | phosphatidic acid phosphatase type 2A                                                               | 140        |
| LOC499736     | similar to Dual specificity protein phosphatase 14 (Mitogen-activated protein kinase phosphatase 6) | 129        |
| Impa2         | inositol (myo)-1(or 4)-monophosphatase 2                                                            | 127        |

|         |                                                                                 |     |
|---------|---------------------------------------------------------------------------------|-----|
| Mtmr2   | myotubularin related protein 2                                                  | 127 |
| Nt5e    | 5' nucleotidase, ecto                                                           | 126 |
| Fbp1    | fructose-1,6- biphosphatase 1                                                   | 124 |
| Ptpra   | protein tyrosine phosphatase, receptor type, A                                  | 124 |
| Ppp2r3a | protein phosphatase 2 (formerly 2A), regulatory subunit B', alpha               | 124 |
| Ppp1cb  | protein phosphatase 1, catalytic subunit, beta isoform                          | 124 |
| Ppef2   | protein phosphatase, EF hand calcium-binding domain 2                           | 124 |
| Ppp3ca  | protein phosphatase 3 (formerly 2B), catalytic subunit, alpha isoform           | 124 |
| Dusp10  | dual specificity phosphatase 10                                                 | 123 |
| Ptprm   | protein tyrosine phosphatase, receptor type, M                                  | 123 |
| Ppm1b   | protein phosphatase 1B, magnesium dependent, beta isoform                       | 123 |
| Ptprs   | protein tyrosine phosphatase, receptor type, S                                  | 122 |
| Ppm1l   | protein phosphatase 1 (formerly 2C)-like                                        | 122 |
| Dusp23  | dual specificity phosphatase 23                                                 | 122 |
| Alpl    | alkaline phosphatase, liver/bone/kidney                                         | 122 |
| Ppp3cc  | protein phosphatase 3, catalytic subunit, gamma isoform                         | 121 |
| Ppp1r3a | protein phosphatase 1, regulatory (inhibitor) subunit 3A                        | 121 |
| Ptp4a3  | protein tyrosine phosphatase 4a3                                                | 121 |
| Ppp2r2d | protein phosphatase 2, regulatory subunit B, delta isoform                      | 121 |
| Dusp11  | dual specificity phosphatase 11 (RNA/RNP complex 1-interacting)                 | 120 |
| Ptplb   | protein tyrosine phosphatase-like (proline instead of catalytic arginine),      | 120 |
| Ppm1d   | protein phosphatase 1D magnesium-dependent, delta isoform                       | 120 |
| Itpa    | inosine triphosphatase (nucleoside triphosphate pyrophosphatase)                | 120 |
| Ilkap   | integrin-linked kinase-associated serine/threonine phosphatase 2C               | 120 |
| Ppm2c   | protein phosphatase 2C, magnesium dependent, catalytic subunit                  | 120 |
| Acp1    | acid phosphatase 1, soluble                                                     | 120 |
| Ptprh   | protein tyrosine phosphatase, receptor type, H                                  | 119 |
| Ppp2r1b | protein phosphatase 2 (formerly 2A), regulatory subunit A (PR 65), beta isoform | 119 |
| Mrip    | myosin phosphatase Rho interacting protein                                      | 119 |
| Ppm1f   | protein phosphatase 1F (PP2C domain containing)                                 | 119 |
| Ptpn6   | protein tyrosine phosphatase, non-receptor type 6                               | 118 |
| Inpp5a  | inositol polyphosphate-5-phosphatase A                                          | 118 |
| Ppm1e   | protein phosphatase 1E (PP2C domain containing)                                 | 118 |
| Ppp2ca  | protein phosphatase 2 (formerly 2A), catalytic subunit, alpha isoform           | 118 |
| Tpte    | transmembrane phosphatase with tensin homology                                  | 118 |
| Ptprc   | protein tyrosine phosphatase, receptor type, C                                  | 118 |
| Ppp1r10 | protein phosphatase 1, regulatory subunit 10                                    | 118 |
| Sirpa   | signal-regulatory protein alpha                                                 | 117 |
| Ptpn9   | protein tyrosine phosphatase, non-receptor type 9                               | 117 |
| Dusp18  | dual specificity phosphatase 18                                                 | 117 |
| Pfkfb3  | 6-phosphofructo-2-kinase/fructose-2,6-biphosphatase 3                           | 117 |
| Rngtt   | RNA guanylyltransferase and 5'-phosphatase                                      | 116 |
| Enpp2   | ectonucleotide pyrophosphatase/phosphodiesterase 2                              | 116 |
| Dusp7   | dual specificity phosphatase 7                                                  | 116 |
| Ppp2r1a | protein phosphatase 2 (formerly 2A), regulatory subunit A, alpha isoform        | 116 |
| Ppp5c   | protein phosphatase 5, catalytic subunit                                        | 115 |
| Ppp2r5a | protein phosphatase 2, regulatory subunit B', alpha isoform                     | 115 |
| Ptprd   | protein tyrosine phosphatase, receptor type, D                                  | 115 |

|          |                                                                                                         |     |
|----------|---------------------------------------------------------------------------------------------------------|-----|
| Dusp4    | dual specificity phosphatase 4                                                                          | 114 |
| Ppp6c    | protein phosphatase 6, catalytic subunit                                                                | 113 |
| Ppme1    | protein phosphatase methylesterase 1                                                                    | 113 |
| Ptpn7    | protein tyrosine phosphatase, non-receptor type 7                                                       | 113 |
| Ctdp1    | CTD (carboxy-terminal domain, RNA polymerase II, polypeptide A) phosphatase, subunit 1                  | 113 |
| Ptpn2    | protein tyrosine phosphatase, non-receptor type 2                                                       | 112 |
| Ptprg    | protein tyrosine phosphatase, receptor type, G                                                          | 111 |
| Ppp2r2a  | protein phosphatase 2 (formerly 2A), regulatory subunit B, alpha isoform                                | 111 |
| Mtmr4    | myotubularin related protein 4                                                                          | 110 |
| Ptpn4    | protein tyrosine phosphatase, non-receptor type 4                                                       | 110 |
| Mtmr6    | myotubularin related protein 6                                                                          | 110 |
| Ptpn1    | protein tyrosine phosphatase, non-receptor type 1                                                       | 110 |
| Ptpn22   | protein tyrosine phosphatase, non-receptor type 22 (lymphoid)                                           | 109 |
| Mtmr3    | myotubularin related protein 3                                                                          | 109 |
| Ppp1r15b | protein phosphatase 1, regulatory (inhibitor) subunit 15b                                               | 109 |
| Ppp1r9b  | protein phosphatase 1, regulatory subunit 9B                                                            | 108 |
| Dusp14   | dual specificity phosphatase 14                                                                         | 108 |
| Ppp1r14a | protein phosphatase 1, regulatory (inhibitor) subunit 14A                                               | 108 |
| Inpp5d   | inositol polyphosphate-5-phosphatase D                                                                  | 108 |
| Pfkfb4   | 6-phosphofructo-2-kinase/fructose-2,6-biphosphatase 4                                                   | 108 |
| Ppp2r5e  | protein phosphatase 2, regulatory subunit B', epsilon isoform                                           | 107 |
| Ptpn5    | protein tyrosine phosphatase, non-receptor type 5                                                       | 107 |
| Cdc25b   | cell division cycle 25 homolog B (S. pombe)                                                             | 107 |
| Ppp1cc   | protein phosphatase 1, catalytic subunit, gamma isoform                                                 | 107 |
| Atp2a3   | ATPase, Ca <sup>++</sup> transporting, ubiquitous                                                       | 106 |
| Ppp1r14c | protein phosphatase 1, regulatory (inhibitor) subunit 14c                                               | 106 |
| Ppap2c   | phosphatidic acid phosphatase type 2c                                                                   | 105 |
| Ptp4a2   | protein tyrosine phosphatase 4a2                                                                        | 105 |
| Ptpn12   | protein tyrosine phosphatase, non-receptor type 12                                                      | 105 |
| Dusp12   | dual specificity phosphatase 12                                                                         | 103 |
| Atp12a   | ATPase, H <sup>+</sup> /K <sup>+</sup> transporting, nongastric, alpha polypeptide                      | 99  |
| Ptpr     | protein tyrosine phosphatase, receptor type, R                                                          | 99  |
| Ppp1r1b  | protein phosphatase 1, regulatory (inhibitor) subunit 1B                                                | 99  |
| Ppp3r1   | protein phosphatase 3, regulatory subunit B, alpha isoform (calcineurin B, type I)                      | 99  |
| Ppp1r12c | protein phosphatase 1, regulatory (inhibitor) subunit 12C                                               | 99  |
| Ppfia3   | protein tyrosine phosphatase, receptor type, f polypeptide (PTPRF), interacting protein (liprin), alpha | 98  |
| Ppap2b   | phosphatidic acid phosphatase type 2B                                                                   | 97  |
| Ppp1r1a  | protein phosphatase 1, regulatory (inhibitor) subunit 1A                                                | 97  |
| Inpp1    | inositol polyphosphate-1-phosphatase                                                                    | 97  |
| Acp6     | acid phosphatase 6, lysophosphatidic                                                                    | 96  |
| Inpp1l   | inositol polyphosphate phosphatase-like 1                                                               | 95  |
| Minpp1   | multiple inositol polyphosphate histidine phosphatase 1                                                 | 93  |
| Bpnt1    | 3'(2'), 5'-bisphosphate nucleotidase 1                                                                  | 92  |
| Tenc1    | tensin like C1 domain containing phosphatase (tensin 2)                                                 | 91  |
| Ppp4c    | protein phosphatase 4, catalytic subunit                                                                | 88  |
| Ptprn    | protein tyrosine phosphatase, receptor type, N                                                          | 88  |
| Inpp5f   | inositol polyphosphate-5-phosphatase F                                                                  | 87  |
| Pgam2    | phosphoglycerate mutase 2 (muscle)                                                                      | 87  |

|          |                                                                                                         |    |
|----------|---------------------------------------------------------------------------------------------------------|----|
| Ppp1r2   | protein phosphatase 1, regulatory (inhibitor) subunit 2                                                 | 87 |
| Dusp8    | dual specificity phosphatase 8                                                                          | 86 |
| Dusp2    | dual specificity phosphatase 2                                                                          | 86 |
| Ppfia1   | protein tyrosine phosphatase, receptor type, f polypeptide (PTPRF), interacting protein (liprin), alpha | 85 |
| Ppp1r1c  | protein phosphatase 1, regulatory (inhibitor) subunit 1C                                                | 85 |
| Ppp1r7   | protein phosphatase 1, regulatory (inhibitor) subunit 7                                                 | 84 |
| Dusp16   | dual specificity phosphatase 16                                                                         | 83 |
| Atp2a2   | ATPase, Ca <sup>++</sup> transporting, cardiac muscle, slow twitch 2                                    | 81 |
| Ptpre    | protein tyrosine phosphatase, receptor type, E                                                          | 81 |
| Ptpdc1   | protein tyrosine phosphatase domain containing 1                                                        | 81 |
| Dusp1    | dual specificity phosphatase 1                                                                          | 80 |
| Akp3     | alkaline phosphatase 3, intestine, not Mn requiring                                                     | 79 |
| Impa1    | Inositol (myo)-1(or 4)-monophosphatase 1                                                                | 78 |
| Alpi     | alkaline phosphatase, intestinal                                                                        | 78 |
| Ppp1r13b | protein phosphatase 1, regulatory (inhibitor) subunit 13B                                               | 77 |
| Ppp1r12a | protein phosphatase 1, regulatory (inhibitor) subunit 12A                                               | 76 |
| Ppfia2   | protein tyrosine phosphatase, receptor type, f polypeptide (PTPRF), interacting protein (liprin), alpha | 76 |
| Phpt1    | phosphohistidine phosphatase 1                                                                          | 76 |
| Ppp3cb   | protein phosphatase 3, catalytic subunit, beta isoform                                                  | 75 |
| Cdc25a   | cell division cycle 25 homolog A (S. pombe)                                                             | 75 |
| Pdpr     | pyruvate dehydrogenase phosphatase regulatory subunit                                                   | 75 |
| Ptpz1    | protein tyrosine phosphatase, receptor-type, Z polypeptide 1                                            | 74 |
| Dusp15   | dual specificity phosphatase-like 15                                                                    | 74 |
| Inpp4a   | inositol polyphosphate-4-phosphatase, type 1                                                            | 71 |
| Ptp4a1   | protein tyrosine phosphatase 4a1                                                                        | 68 |
| Pnkp     | polynucleotide kinase 3'-phosphatase                                                                    | 67 |
| Pstpip1  | proline-serine-threonine phosphatase-interacting protein 1                                              | 67 |
| Inpp5b   | inositol polyphosphate-5-phosphatase B                                                                  | 65 |
| G6pc3    | glucose 6 phosphatase, catalytic, 3                                                                     | 64 |
| Inpp5j   | inositol polyphosphate-5-phosphatase J                                                                  | 63 |
| Dusp22   | dual specificity phosphatase 22                                                                         | 62 |
| Sgpp1    | sphingosine-1-phosphate phosphatase 1                                                                   | 61 |
| Ppp1r15a | protein phosphatase 1, regulatory (inhibitor) subunit 15A                                               | 61 |
| Ppp2r5b  | protein phosphatase 2, regulatory subunit B', beta isoform                                              | 61 |
| Lppr2    | lipid phosphate phosphatase-related protein type 2                                                      | 58 |
| Pld1     | phospholipase D1                                                                                        | 57 |
| Atp2a1   | ATPase, Ca <sup>++</sup> transporting, cardiac muscle, fast twitch 1                                    | 57 |
| Mtmr9    | myotubularin related protein 9                                                                          | 56 |
| Minpp1   | multiple inositol polyphosphate histidine phosphatase 1                                                 | 55 |
| Ppp1r3b  | protein phosphatase 1, regulatory (inhibitor) subunit 3B                                                | 55 |
| Cdkn3    | cyclin-dependent kinase inhibitor 3                                                                     | 54 |
| Atp2c1   | ATPase, Ca <sup>++</sup> transporting, type 2C, member 1                                                | 54 |
| Ppp1r14b | protein phosphatase 1, regulatory (inhibitor) subunit 14B                                               | 51 |
| Cdc25c   | cell division cycle 25 homolog C (S. pombe)                                                             | 47 |
| Acpt     | acid phosphatase, testicular                                                                            | 46 |
| Pstpip2  | proline-serine-threonine phosphatase-interacting protein 2                                              | 43 |
| Synj2    | synaptojanin 2                                                                                          | 40 |
| Acpp     | acid phosphatase, prostate                                                                              | 39 |



|         |                                                                                        |    |
|---------|----------------------------------------------------------------------------------------|----|
| Ctdspl  | CTD (carboxy-terminal domain, RNA polymerase II, polypeptide A) small phosphatase-like | 39 |
| Ppp1r11 | protein phosphatase 1, regulatory (inhibitor) subunit 11                               | 36 |
| Entpd3  | ectonucleoside triphosphate diphosphohydrolase 3                                       | 31 |
| Pptc7   | PTC7 protein phosphatase homolog ( <i>S. cerevisiae</i> )                              | 24 |
| Acp2    | acid phosphatase 2, lysosomal                                                          | 20 |
| Enpp3   | ectonucleotide pyrophosphatase/phosphodiesterase 3                                     | 15 |
| Ppp1r8  | protein phosphatase 1, regulatory (inhibitor) subunit 8                                | 0  |

**Supplementary Table 1. siRNA phosphatase screen.**

Table represents list of siRNAs transduced into NBT-II cells and treated with HGF. siRNA are ranked according to percent wound healing repair (%WHR).
